1     **UV radiation increases flavonoid protection but decreased**  
2                             **reproduction in *Silene littorea***

3  
4  
5     J. C. Del Valle<sup>1\*</sup>, M. L. Buide<sup>1</sup>, J. B. Whittall<sup>2</sup>, F. Valladares<sup>3</sup>, E. Narbona<sup>1</sup>.

6  
7     <sup>1</sup> Departamento de Biología Molecular e Ingeniería Bioquímica, Universidad Pablo de  
8     Olavide, Seville, Spain

9     <sup>2</sup> Department of Biology, Santa Clara University, Santa Clara, CA, USA

10    <sup>3</sup> Instituto de Recursos Naturales, Centro de Ciencias Medioambientales, CSIC, Madrid, Spain

11

12    \* Corresponding author ([jcdelgar@upo.es](mailto:jcdelgar@upo.es))

13

## 14 **Abstract**

15           Plants respond to changes in ultraviolet (UV) radiation via morphological and  
16 physiological changes. Among the variety of plant UV-responses, the synthesis of UV-  
17 absorbing flavonoids constitutes an effective non-enzymatic mechanism to mitigate  
18 photoinhibitory and photooxidative damage caused by UV stress, either reducing the  
19 penetration of incident UV radiation or acting as quenchers of reactive oxygen species (ROS).  
20 In this study, we designed a UV-exclusion experiment to investigate the effects of UV  
21 radiation in *Silene littorea*. We spectrophotometrically quantified concentrations of both  
22 anthocyanins and non-anthocyanin flavonoids (flavones) in petals, calyces, leaves and stems.  
23 Furthermore, we analyzed the UV effect on the photosynthetic activity in hours of maximum  
24 solar radiation and we tested the impact of UV radiation on male and female reproductive  
25 performance. We found that anthocyanin concentrations showed a significant decrease of  
26 about 20% with UV-exclusion in petals and stems, and 30% in calyces. Flavone  
27 concentrations showed a significant reduction of approximately 25% in calyces and stems,  
28 and 12% in leaves. Photochemical efficiency of plants grown under UV stress decreased  
29 sharply at maximum light stress, but their ability for recovery after light-stress was not  
30 affected. In addition, exposure to UV radiation does not seem to affect ovule production or  
31 seed set, but decreases the total seed production per plant and pollen production by 69%  
32 and 31%, respectively. Our results demonstrate that UV radiation produced opposite effects  
33 on flavonoid accumulation and reproduction in *S. littorea*. UV stress increased flavonoid  
34 concentrations, suggesting a photoprotective role of flavonoids against UV radiation, but

35 had negative consequences for reproduction. We propose that this trade-off helps this  
36 species to occupy exposed habitats with high UV radiation.

37

38 **Keywords:** abiotic stress, anthocyanins, Caryophyllaceae, flavones, male and female

39 reproductive performance, photoprotection, photosynthesis, secondary metabolites, UV

40 radiation.

## 41 Introduction

42 Ultraviolet (UV) radiation can both help and harm plants. Many flowering plants rely  
43 on UV nectar guides for pollination services [1]. Simultaneously, the high energy of UV  
44 radiation can be damaging to cells and presents a unique abiotic challenge to most land  
45 plants [2]. Furthermore, the “invisible” nature of UV radiation makes it particularly enigmatic  
46 at the ecological and physiological scales. UV-A (315 – 400 nm) and UV-B (280 – 315 nm)  
47 radiation has numerous positive and negative effects at the cellular and organismal scales  
48 [3–6], inducing a variety of morphological responses in plants [4,7]. In addition, UV-B  
49 radiation exerts damaging effects on DNA and chloroplasts, particularly photosystem II (PSII),  
50 and indirectly generate reactive oxygen species (ROS) that can further damage the  
51 photosynthetic apparatus [8,9].

52 Plants have developed a variety of mechanisms to avoid the harmful effects of UV  
53 radiation, mainly through the screening of UV wavelengths, the repairing of UV-induced  
54 damage or the quenching of ROS [6,8,9]. Although the latter is primarily performed by  
55 antioxidant enzymes that control ROS levels [8,10], flavonoids and other phenolic  
56 compounds are involved in the detoxification of ROS as well [11–13]. Flavonoids are potent  
57 scavengers of ROS that prevent lipid peroxidation and scavenge free radicals, especially  
58 those flavonoids having a catechol group in the B-ring of the flavonoid skeleton (e.g.  
59 quercetin derivatives) [14,15]. Furthermore, exposure to excess light or UV-B radiation  
60 increases the synthesis of effective antioxidant dihydroxy B-ring-substituted flavonoids (e.g.  
61 luteolin derivatives) at expense of other less effective antioxidant flavonoids (e.g.  
62 kaempferol derivatives) [16,17]. In addition to their key antioxidant functions, other studies

63 have attributed to flavonoids an important role in photoprotection through the screening of  
64 the UV radiation [18,19]. For example, epidermal flavonols play a predominant role in UV-B  
65 screening in leaves of *Secale cereale* and *Centella asiatica* [20,21].

66         Within the flavonoids, anthocyanins are plant pigments that are synthesized in the last  
67 steps of the flavonoid biosynthetic pathway [22]. Anthocyanins mainly absorb in the green  
68 region of visible (VIS) spectrum (500-565 nm), reducing the overall photosynthetically active  
69 radiation (PAR) (400 - 700nm) hitting the chloroplasts and helping plants to have a faster  
70 photosynthetic recovery after saturating light stress [23–25]. In addition, when anthocyanins  
71 are acylated, they can absorb UV radiation, and may contribute to ROS scavenging even  
72 more than other phenolic compounds [26–29]. Yet, UV stress is known to induce  
73 anthocyanin biosynthesis, which may contribute to the tolerance to UV radiation [30,31].

74         The aforementioned photoprotective functions of UV-induced flavonoids are not  
75 restricted to photosynthetic tissues, but also occur in floral structures such as anthers,  
76 ovaries, petals and sepals. Pollen grains accumulate flavonoids to protect them from UV-B  
77 damage and preserve their viability after anthesis [32], whereas flavonoids protect ovules by  
78 shielding ovaries from UV radiation [33]. In the same way, the accumulation of protective  
79 flavonoids in petals and sepals can reduce the damaging effects of UV radiation on these and  
80 other nearby reproductive tissues [34]. Additionally, petal flavonoids form a UV  
81 pigmentation floral pattern to guide pollinators to nectaries, thus UV-induced changes in the  
82 size of nectar guides might affect the pollination activity [1,35]. In addition, UV radiation may  
83 induce a variety of plant morphological responses in these reproductive structures. Many  
84 studies have reported a complex UV dose-response involving differential effects on  
85 reproductive morphological traits (reviewed in [7]). For example, Koti et al. reported that

86 UV-B radiation negatively affected the flower phenology, pollen germination and its viability  
87 in soybean (*Glycine max*) [36], and similarly decreased pollen and flower production over  
88 time in *Brassica rapa* [37].

89         This paper describes the effects of UV-radiation in flavonoid accumulation and  
90 reproduction of the shore campion (*Silene littorea* Brot., Caryophyllaceae). This annual  
91 species is endemic to coastal foredunes along the Iberian Peninsula and accumulates  
92 flavonoids (flavones and anthocyanins) in petals, calyces, stems and leaves [38,39]. Our  
93 previous work has shown a latitudinal gradient in flavonoid accumulation that tends to  
94 increase from north to south in most plant tissues - correlated with increased solar exposure  
95 and temperatures [39]. Moreover, we found that intense solar radiation, including UV and  
96 VIS spectra, increased the synthesis of flavones and anthocyanins in most aboveground  
97 tissues of *S. littorea* [40]. In this study, we focus on the effect of the UV irradiation on  
98 flavonoid accumulation in this species. We quantified the concentrations of flavones and  
99 anthocyanins in petals, calyces, leaves and stems of plants grown with or without exposure  
100 to UV radiation. Then, we analyzed the UV effects on the photosynthetic efficiency and the  
101 male and female reproductive output.

102         Flavonoids have a key role in photoprotection [15,19], but the synthesis of these  
103 compounds may represent a cost for the plant [24]. Consequently, we predict that the  
104 exclusion of UV radiation will result in a decrease in UV-inducible flavonoid concentrations in  
105 all tissues. This energetic and carbon savings under UV-exclusion may result in increased  
106 reproductive allocation [41]. In contrast, without UV protection, we predict that  
107 photodamage will decrease photosynthetic activity [9,42] and show lower reproductive  
108 output. Since *S. littorea* inhabits exposed coastal dunes habitats with high solar radiation

109 levels, we hypothesize that this species will have effective light-stress recovery system that  
110 prevents long-term photoinhibition.

111

## 112 **Materials and methods**

### 113 **Study system and experimental design**

114 *Silene littorea* is an annual plant that accumulates anthocyanins (cyanidin derivatives)  
115 and flavones (mainly isovitexin and isoorientin derivatives) in both reproductive and  
116 vegetative tissues [38] (Fig 1). This species inhabits coastal populations from the  
117 northwestern corner to the southeastern portion of the Iberian Peninsula [39]. We collected  
118 seeds of six plants from a northwestern population (Furnas; 42° 38' 15" N, 9° 2' 21" W) and  
119 six plants from a southwestern population (Sines; 37° 55' 17" N, 8° 48' 17" W). These two  
120 populations, which are separated by approximately 500 km along the Atlantic coast of the  
121 Iberian Peninsula, are exposed to a different degree of solar irradiance, being approximately  
122 30% higher in southern latitudes [39].

123

124 **Fig 1. Details of a *Silene littorea* plant (A) to show the accumulation of anthocyanins**  
125 **throughout the whole plant.** B, C and D showed stereo-microscope photographs of surface  
126 of the calyx ribs, adaxial surface of the leaf, and cross section of a stem, respectively. Scale  
127 bar: 5 mm (A), 0.5 mm (B, C), and 1 mm (D).

128

129 Seeds obtained from the 12 maternal families were scarified and maintained at 45 °C  
130 for a month to break dormancy, and afterwards they were germinated in a germination

131 chamber at 22 °C/15 °C (12 h light/12 h dark). The resulting seedlings were planted in pots  
132 filled with 2.5 L of a mixture of standard substrate (80-90% organic material, pH = 6.5) and  
133 beach sand (v:v 50:50) and were grown in the greenhouse at Pablo de Olavide University  
134 (Seville, Spain) for one month. In February 2016 (one month before flowering), pots were  
135 put outside on two benches in the experimental garden. The bench assigned to the UV-  
136 present treatment was covered with a methacrylate filter that transmitted 100% UV  
137 irradiance, whereas the bench assigned to the UV-exclusion treatment was covered with a  
138 polycarbonate filter preventing most UV radiation ( $< \sim 385\text{nm}$ ). The UV-exclusion treatment  
139 produced a reduction of 9.2% and 100% of total transmitted sunlight and UV radiation,  
140 respectively. Maximum solar irradiation at natural sunlight was  $1258 \text{ W/m}^2$  and UV  
141 irradiance was  $4.36 \text{ W/m}^2$ . Measures were taken at 14:00 h of a sunny day (6<sup>th</sup> June 2016).  
142 Total solar radiance and UV were measured by means of Megger PVM210 irradiance meter  
143 (range sensitivity =  $1999 \text{ W/m}^2$ ; resolution =  $0.1 \text{ W/m}^2$ ) (Megger Co., Dallas, USA) and PCE-  
144 UV34 UV light meter (range sensitivity = 0.000 to  $19.9 \text{ W/m}^2$ ; resolution =  $0.01 \text{ W/m}^2$ ) (PCE  
145 Inst., Durham, UK), respectively. Given the low germination rates of this species and the high  
146 mortality at the seedling stage, the final number of surviving plants was 65 (belonging to  
147 nine maternal families). These plants were assigned to the UV-present (41) and UV-exclusion  
148 (24) treatments, respectively (S1 Table). Plants that shared the same maternal family were  
149 equally assigned to each treatment whenever possible.

150

## 151 **Flavonoid quantification**

152 During peak flowering (May 2016), samples of petals, calyces (five petals and the  
153 calyx of the same flower), leaves (selected mid-stem) and stems (1 cm length section from



154 the main axis) were collected from 34 and 22 plants grown in the UV-present and UV-  
155 exclusion environments, respectively (S1 Table). Samples were extracted in 1.5 ml of MeOH  
156 containing 1% of HCl following the procedure described in Del Valle et al. [39]. Three  
157 replicates of 200  $\mu$ L per sample extraction were used to estimate flavonoid concentrations  
158 using a Multiskan GO microplate spectrophotometer (Thermo Fisher Scientific Inc., MA,  
159 USA). Anthocyanins and flavones were quantified at  $A_{520}$  and  $A_{350}$ , respectively. In  
160 photosynthetic organs (calyces, leaves and stems), anthocyanin concentration was corrected  
161 as  $A_{520} - (0.24 \times A_{653})$  to compensate for the small overlap absorption by chlorophyll [43].  
162 Anthocyanins and flavones concentrations were calculated following Del Valle et al. [38] and  
163 expressed as milligrams of cyanidin-3-glucoside, isovitexin and isoorientin equivalents per  
164 gram fresh weight, respectively.

165

## 166 **Assessment of photosynthetic activity**

167 To determine if there were physiological consequences of plants grown with and  
168 without UV radiation, the photochemical efficiency of PSII ( $F_v/F_m$ ) was measured in calyces  
169 and leaves of 30 plants from Sines (14 and 16 from the UV-present and UV-exclusion  
170 treatments, respectively) using a field portable pulse-modulated chlorophyll fluorometer  
171 (FMS2, Hansatech Instruments, Norfolk, UK). Measurements were carried out in predawn ( $\sim$   
172 0700h) and in maximum solar radiation ( $\sim$ 1430h), and in the early (March) and maximum  
173 (May) stages of the flowering period. To assess the physiological status of photosynthetic  
174 tissues across the experiment, measurements were carried out in fully exposed plants on  
175 two sunny days [44]. To minimize temporal variation in  $F_v/F_m$ , all measurements were made

176 in a period of one hour. Prior to taking physiological measurements, samples were  
177 acclimated for 30 minutes in dark using leaf-clips that contain a mobile shutter.

178

## 179 **Assessment of plant reproductive performance**

180 Flower and fruit production in 41 and 24 plants from the UV-present and UV-  
181 exclusion treatments were monitored weekly during the entire flowering period, from  
182 March 10<sup>th</sup> to June 20<sup>th</sup>. These individual flowers were monitored for either fruit production  
183 or fruit abortion to determine the proportion of flowers that set fruit. In May, one mature  
184 fruit per plant was collected if possible. A total of 33 and 21 mature fruits were collected  
185 from plants growing in the UV-present and UV-exclusion treatments, respectively. For each  
186 mature fruit, their seeds and aborted ovules were counted under the dissecting microscope  
187 to calculate the proportion of ovules that set seed. Then, seed production per plant was  
188 estimated for those plants from which we collected mature fruits and calculated as the  
189 product of seeds/fruit x total number of fruits produced during the flowering period. Pollen  
190 and ovule production were analyzed following the procedure described in Narbona et al.  
191 [45] from unopened flower buds preserved in FAA (95 % ethanol, dH<sub>2</sub>O, 37-40 %  
192 formaldehyde, acetic glacial acid, 10:7:2:1) of nine and 13 plants grown in the UV-present  
193 and UV-exclusion treatments, respectively. The total number of pollen grains per anther was  
194 calculated as the average of pollen grains counted in one upper and one lower anther of an  
195 unopened flower bud per plant.

196

## 197 **Statistical analysis**

198           Generalized linear mixed models (GLMMs) with Gaussian link functions were used to  
199 test the effect of UV radiation on the accumulation of anthocyanins and flavones in each  
200 plant tissue, considering treatment and population as fixed factors and maternal family as a  
201 random factor. Flavonoid concentrations were log-transformed prior to conduct the GLMMs  
202 analysis. Pairwise comparisons between UV-present and UV-exclusion treatments were  
203 carried out using the “multcomp” R-package and its “cld” (compact letter display) function  
204 was used to show differences between populations [46]. Due to the low number of  
205 experimental plants, we used the conservative Bonferroni adjustment of p-values in pairwise  
206 comparisons [47]. The same analyses were used to test for differences in male and female  
207 reproductive performance and in the photochemical efficiency of PSII ( $F_v/F_m$ ) between  
208 plants grown in the different UV treatments. For this latter analysis, independent  
209 comparisons were done for leaves and calyces and in the early (March) and maximum (May)  
210 stages of the experiment, as well as pairwise comparisons of the photochemical efficiency  
211 between predawn and afternoon conditions. Pearson’s correlations with a Bonferroni  
212 adjustment for multiple comparisons were used to assess the relationship between  
213 flavonoid production and male and female reproductive output [48]. All analyses were  
214 performed in R v3.4.0 [49]. GLMMs were carried out using the R library “lme4” [50].

215

## 216 **Results**

### 217 **Effects of UV radiation on flavonoid production**

218           In general, plants from the UV-exclusion treatment showed lower accumulation of  
219 anthocyanins, but this decrease was not homogenous in all tissues. Specifically, anthocyanin

220 concentrations in petals and stems decreased approximately 20% in these plants, whereas in  
221 calyces the decrease was of 30% and the differences were marginally significant (Fig 2, Table  
222 1). Anthocyanins were nearly absent altogether in leaves (Fig 2E). Flavone concentrations in  
223 plants from the UV-exclusion treatment were lower by 12%, 23%, and 25% in leaves, calyces,  
224 and stems, respectively, but in petals the differences were not significant (Table 1).

225

226 **Fig 2. Boxplots representing anthocyanin and flavone concentrations in the UV-present**  
227 **(purple boxes) and UV-exclusion (white boxes) treatments in petals (A, B), calyces (C, D),**  
228 **leaves (E, F) and stems (G, H).** The central line displays the median, the bottom and top of  
229 the box are the first and third quartiles, and dots represent sample values. Lowercase letters  
230 are used to show results of multiple comparisons between populations. Within each  
231 population, pairwise comparisons between light treatments using Bonferroni adjustment are  
232 showed. FW, fresh weight; ns, not significant; ns\*, marginally significant; \*,  $P < 0.05$ ; \*\*,  $P <$   
233  $0.01$ ; \*\*\*,  $P < 0.001$ .

234

**Table 1.** Results from GLMMs testing the effect of UV radiation, population and their interaction on the production of anthocyanins and flavones in each plant tissue.

| Tissue  | Source of variation | Anthocyanins |                |                  |       |              | Flavones |                |                  |       |                  |
|---------|---------------------|--------------|----------------|------------------|-------|--------------|----------|----------------|------------------|-------|------------------|
|         |                     | SS           | Numerator d.f. | Denominator d.f. | F     | P            | SS       | Numerator d.f. | Denominator d.f. | F     | P                |
| Petals  | Treatment           | 0.670        | 1              | 46.62            | 7.968 | <b>0.007</b> | 0.019    | 1              | 38.78            | 1.469 | 0.233            |
|         | Population          | 0.033        | 1              | 19.79            | 0.396 | 0.536        | 0.477    | 1              | 42.86            | 36.15 | <b>&lt;0.001</b> |
|         | Treatm. x Pop.      | 0.096        | 1              | 47.86            | 1.140 | 0.291        | 0.001    | 1              | 38.68            | 0.004 | 0.949            |
| Calyces | Treatment           | 0.674        | 1              | 44.48            | 3.729 | 0.059        | 1.013    | 1              | 44.39            | 37.27 | <b>&lt;0.001</b> |
|         | Population          | 0.121        | 1              | 43.22            | 0.667 | 0.419        | 0.606    | 1              | 46.06            | 22.29 | <b>&lt;0.001</b> |
|         | Treatm. x Pop.      | 0.231        | 1              | 45.11            | 1.276 | 0.265        | 0.018    | 1              | 44.94            | 0.647 | 0.426            |
| Leaves  | Treatment           | 0.007        | 1              | 46.70            | 0.176 | 0.677        | 0.368    | 1              | 49.00            | 5.145 | <b>0.028</b>     |
|         | Population          | 0.078        | 1              | 23.18            | 1.899 | 0.181        | 1.166    | 1              | 49.00            | 16.28 | <b>&lt;0.001</b> |
|         | Treatm. x Pop.      | 0.199        | 1              | 48.29            | 4.840 | <b>0.033</b> | 0.023    | 1              | 49.00            | 0.327 | 0.570            |
| Stems   | Treatment           | 1.572        | 1              | 44.65            | 8.527 | <b>0.005</b> | 1.295    | 1              | 46.10            | 6.203 | <b>0.016</b>     |
|         | Population          | 0.035        | 1              | 49.27            | 0.191 | 0.664        | 0.049    | 1              | 42.77            | 0.237 | 0.629            |
|         | Treatm. x Pop.      | 0.339        | 1              | 45.22            | 1.837 | 0.182        | 0.008    | 1              | 46.92            | 0.041 | 0.841            |

Significant *P*-values were highlighted in bold.

236 Sines and Furnas populations did not show significant differences in anthocyanin  
237 concentrations in any of the sampled tissues (Table 1). Conversely, the flavone  
238 concentrations were significantly higher in plants from Sines, the southern population, in all  
239 tissues except for the stems (Fig 2, Table 1), and the interactions of light treatment and  
240 population were not significant (i.e. the decrease of flavone concentration in UV-exclusion  
241 plants was homogeneous in both populations).

242 When we analyzed each population independently, we found that the only significant  
243 differences in anthocyanin concentrations between treatments were in petals of plants from  
244 Furnas and in stems of plants from Sines (Figs 2A and G). With respect to flavones  
245 concentrations, the only significant differences between treatments were found in calyces of  
246 plants from both populations (Fig 2D). Interestingly, plants from both UV-exclusion and UV-  
247 present treatments of Sines showed higher levels of flavones than their respective  
248 treatments in Furnas.

249

## 250 **Effects of UV radiation in photosynthetic performance**

251 Plants decreased their photochemical efficiency ( $F_v/F_m$ ) in the afternoon, when  
252 plants were maximally exposed to light stress, but in the predawn, after a whole night of  
253 relaxation of photoinactivation, they showed  $F_v/F_m$  values within the range of healthy  
254 plants ( $\sim 0.85$ ) (Fig 3, Table 2). Leaves showed significant differences in their photochemical  
255 efficiency between UV-treatments and between measurement conditions (predawn or  
256 afternoon), and the interaction of UV-treatments and measurement conditions was also  
257 significant (Table 2). In the afternoon, leaves of the UV-exclusion treatment showed a 20.8%  
258 and 57.4% reduction of  $F_v/F_m$  values in early (March) and maximum (May) stages of the

259 flowering period, respectively ( $P < 0.001$  for both pairwise comparisons, Table 3; Fig 3A and  
 260 B). In calyces, statistical differences in their photochemical efficiency were found only  
 261 between measurement conditions (predawn or afternoon) both in March and May (Table 2).  
 262 Pairwise comparisons in calyces revealed significant lower  $Fv/Fm$  values in afternoon  
 263 conditions, regardless of the UV treatment or the flowering period ( $P < 0.032$ , Table 3; Fig 3C  
 264 and D).

265

266 **Fig 3. Variation of photochemical efficiency ( $Fv/Fm$ ) from predawn conditions to**  
 267 **afternoon.** The mean  $Fv/Fm$  values obtained from leaves (A, B) and calyces (C, D) in the early  
 268 (March; A and C) and maximum (May; B and D) stages of the flowering period are showed.  
 269 Plants from the UV-present treatment are displayed by pink filled circles and solid lines,  
 270 whereas those from the UV-exclusion treatment are displayed with empty circles and  
 271 dashed lines. Results of independent pairwise comparisons after Bonferroni corrections  
 272 between UV treatments in predawn and afternoon conditions are displayed. Error bars  
 273 represent  $\pm$  SE.

274

**Table 2.** Results from GLMMs testing the effect of UV radiation, measurement condition (predawn or afternoon) and their interaction on the photochemical efficiency of PSII ( $Fv/Fm$ ) in leaves and calyces.

| Tissue | Stage         | Source of variation             | SS    | Numerator d.f. | Denominator d.f. | F     | P       |
|--------|---------------|---------------------------------|-------|----------------|------------------|-------|---------|
| Leaves | Early (March) | Treatment                       | 0.030 | 1              | 50.00            | 19.07 | < 0.001 |
|        |               | Measurement condition           | 0.056 | 1              | 50.00            | 34.86 | < 0.001 |
|        |               | Treatm. x Measurement condition | 0.020 | 1              | 50.00            | 12.34 | < 0.001 |
|        | Maximum (May) | Treatment                       | 0.083 | 1              | 40.00            | 6.209 | 0.017   |
|        |               | Measurement condition           | 0.528 | 1              | 40.00            | 39.50 | < 0.001 |
|        |               | Treatm. x Measurement condition | 0.115 | 1              | 40.00            | 8.614 | 0.006   |

|         |                  |                                 |       |   |       |       |                   |
|---------|------------------|---------------------------------|-------|---|-------|-------|-------------------|
| Calyces | Early<br>(March) | Treatment                       | 0.004 | 1 | 32.39 | 2.822 | 0.103             |
|         |                  | Measurement condition           | 0.039 | 1 | 47.25 | 30.42 | <b>&lt; 0.001</b> |
|         |                  | Treatm. x Measurement condition | 0.004 | 1 | 47.25 | 3.401 | 0.071             |
|         | Maximum<br>(May) | Treatment                       | 0.001 | 1 | 40.39 | 0.182 | 0.672             |
|         |                  | Measurement condition           | 0.375 | 1 | 38.80 | 48.32 | <b>&lt; 0.001</b> |
|         |                  | Treatm. x Measurement condition | 0.005 | 1 | 38.80 | 0.639 | 0.429             |

Significant *P*-values were highlighted in bold.

275

**Table 3. Comparisons of the photochemical efficiency (*Fv/Fm*) between predawn and afternoon conditions.** Pairwise comparisons were independently performed in leaves and calyces from the UV-exclusion and UV-present treatments and either in the early (March) and maximum (May) stages of flowering period.

| Tissue  | Stage         | Treatment    | Estimate | Std. Error | Z value | <i>P</i>          |
|---------|---------------|--------------|----------|------------|---------|-------------------|
| Leaves  | Early (March) | UV-exclusion | -0.027   | 0.014      | -1.873  | 0.239             |
|         |               | UV-present   | -0.104   | 0.017      | -6.117  | <b>&lt; 0.001</b> |
|         | Maximum (May) | UV-exclusion | -0.117   | 0.047      | -2.480  | 0.063             |
|         |               | UV-present   | -0.323   | 0.052      | -6.252  | <b>&lt; 0.001</b> |
| Calyces | Early (March) | UV-exclusion | -0.037   | 0.013      | -2.788  | <b>0.032</b>      |
|         |               | UV-present   | -0.073   | 0.015      | -4.889  | <b>&lt; 0.001</b> |
|         | Maximum (May) | UV-exclusion | -0.163   | 0.035      | -4.611  | <b>&lt; 0.001</b> |
|         |               | UV-present   | -0.205   | 0.039      | -5.202  | <b>&lt; 0.001</b> |

Significant *P*-values were highlighted in bold.

276

## 277 Effects of UV radiation in reproductive performance

278 Flower production showed statistical differences between the two experimental  
 279 conditions (Table 4). Plants from the UV-exclusion treatment displayed approximately five  
 280 times more flowers than those with UV-present ( $261.4 \pm 30.1$  and  $50.7 \pm 8.3$ , respectively;  
 281 mean  $\pm$  SE; Fig 4A). In addition, flower production was significantly different for both  
 282 populations, being higher in Sines plants. Conversely, fruit set was statistically higher in the  
 283 UV-present treatment and in plants from Furnas population (Fig 4B, Table 4). The number of



284 ovules per flower and seed set was statistically similar between light treatments or  
 285 populations (Figs 4C and D). The total seed production per plant was approximately three  
 286 times higher in plants from the UV-exclusion treatment compared to the UV-present plants  
 287 ( $46.2 \pm 7.8$  and  $14.3 \pm 1.9$ , respectively; Fig 4E), and did not show statistical differences  
 288 between populations (Table 4). Pollen production decreased by ~31% in plants exposed to  
 289 UV radiation ( $2126.1 \pm 99.0$  and  $1473.9 \pm 85.8$ , respectively; Fig 4F), but again differences  
 290 between populations was not found. The interactions of UV treatment and population were  
 291 not significant for any of the studied reproductive outputs (Table 4).

292

293 **Fig 4. Boxplots representing the total flowers per plant (A), fruit set (B), ovules per flower**  
 294 **(C), seed set (D), seed production per plant (E) and pollen per anther (F) in plants growing**  
 295 **in the UV-present (purple boxes) and UV-exclusion (white boxes) treatments. Dots**  
 296 **represent values for all estimations of plant reproductive performance. The central line**  
 297 **displays the median, the bottom and top of the box are the first and third quartiles, and dots**  
 298 **represent sample values. Letters displays are used to show results of multiple comparisons**  
 299 **between populations. Within each population, pairwise comparisons between light**  
 300 **treatments using Bonferroni adjustment are showed. ns, not significant; \*,  $P < 0.05$ ; \*\*,  $P <$**   
 301  **$0.01$ ; \*\*\*,  $P < 0.001$ .**

302

**Table 4.** Results from GLMMs testing the effect of UV radiation, population and their interaction on the estimations of male and female reproductive performance in *S. littorea*.

|                   | Source of variation | SS    | Numerator d.f. | Denominator d.f. | F     | P       |
|-------------------|---------------------|-------|----------------|------------------|-------|---------|
| Flowers per plant | Treatment           | 37.55 | 1              | 52.45            | 58.04 | < 0.001 |
|                   | Population          | 5.040 | 1              | 6.604            | 7.789 | 0.029   |
|                   | Treatm. x Pop.      | 0.648 | 1              | 60.01            | 1.002 | 0.321   |

|                            |                |       |   |       |       |                   |
|----------------------------|----------------|-------|---|-------|-------|-------------------|
| Fruit set                  | Treatment      | 1.457 | 1 | 61.00 | 9.476 | <b>0.003</b>      |
|                            | Population     | 2.405 | 1 | 61.00 | 15.64 | <b>&lt; 0.001</b> |
|                            | Treatm. x Pop. | 0.112 | 1 | 61.00 | 0.725 | 0.398             |
| Ovules per flower          | Treatment      | 0.020 | 1 | 12.21 | 0.524 | 0.483             |
|                            | Population     | 0.050 | 1 | 17.02 | 1.282 | 0.273             |
|                            | Treatm. x Pop. | 0.007 | 1 | 12.55 | 0.183 | 0.677             |
| Seed set                   | Treatment      | 0.056 | 1 | 48.29 | 0.267 | 0.608             |
|                            | Population     | 0.001 | 1 | 27.29 | 0.009 | 0.924             |
|                            | Treatm. x Pop. | 0.140 | 1 | 49.75 | 0.666 | 0.418             |
| Seeds production per plant | Treatment      | 11.42 | 1 | 50.00 | 21.48 | <b>&lt; 0.001</b> |
|                            | Population     | 0.401 | 1 | 50.00 | 0.755 | 0.389             |
|                            | Treatm. x Pop. | 0.012 | 1 | 50.00 | 0.022 | 0.883             |
| Pollen per anther          | Treatment      | 0.616 | 1 | 17.00 | 25.32 | <b>&lt; 0.001</b> |
|                            | Population     | 0.004 | 1 | 17.00 | 0.158 | 0.696             |
|                            | Treatm. x Pop. | 0.093 | 1 | 17.00 | 3.807 | 0.067             |

Significant *P*-values were highlighted in bold.

303

304           When assessing the relationship between flavonoid production and male and female  
305 reproductive outputs, we did not find any significant correlations at Bonferroni-corrected  
306 level ( $\alpha = 0.05/6 = 0.008$ ) (S2 Table).

307

## 308 **Discussion**

### 309 **Effects of UV radiation on flavonoid production**

310           Exposure to UV radiation led to a generalized increase in the anthocyanin and flavone  
311 concentrations in *S. littorea*, suggesting that increasing flavonoid concentrations is part of  
312 this plant's response to UV stress. In this species, all anthocyanins in aboveground tissues  
313 are cyanidin derivatives, whereas the most abundant flavones are apigenin derivatives  
314 (isovitexin) in petals and luteolin derivatives (isoorientin) in photosynthetic tissues [38].

315 Isoorientins are dihydroxy B-ring-substituted flavonoids, which it is known to have higher  
316 antioxidant properties [14,51–53]. In this regard, the UV-induced accumulation of efficient  
317 antioxidant flavonoids has been previously described in plants. For example, the flavonoid  
318 composition in leaves of the white clover (*Trifolium repens*) is affected by solar radiation, as  
319 the concentration of quercetin increases under UV-B stress rather than those of less  
320 effective antioxidants such as monohydroxylated kaempferol glycosides [54]. In addition,  
321 most anthocyanins and flavones in *S. littorea* are acylated [38], which it is known to enhance  
322 the flavonoid absorption in the UV-A and UV-B wavelength [28,55,56]. In *Cistus salvifolius*,  
323 for example, the occurrence of acylated flavonoids in trichomes ameliorates stress from  
324 excess UV radiation [57], whereas leaves of purple basil (*Ocimum basilicum*) accumulate  
325 coumaroyl anthocyanins that are more responsive to quenching sunlight irradiance, mainly  
326 in the UV-B wavelength, than non-acylated anthocyanins [27]. Although we did not obtain  
327 direct evidences of variations of the flavonoid-mediate quenching of UV-induced free  
328 radicals in *S. littorea*, its flavonoid profile, including acylated and efficient antioxidant  
329 flavonoids, suggests that this species show a robust biochemical toolkit that may protect  
330 itself from the oxidative stress caused by UV radiation.

331           Despite differences in flavonoid production caused by UV radiation, plants not  
332 exposed to UV light accumulated important amounts of anthocyanins and flavones in most  
333 aboveground tissues. This may be due to the incidence of high levels of PAR on these plants.  
334 Several studies indicate that UV irradiance is not a prerequisite for flavonoid biosynthesis.  
335 For example, the concentration of UV-absorbing quercetin in *Brassica oleracea* increases in  
336 line with PAR levels [58]. In *Arabidopsis thaliana*, PAR-only exposure contributes to the  
337 formation of a base amount of quercetin, providing a basic photoprotection that is further

338 increased by long term exposure to UV-A/B radiation [59]. Similarly, high levels of PAR might  
339 lead to the formation of a base amount of anthocyanins and flavones in *S. littorea*, whose  
340 concentrations could be optimized and increased when plants are exposed to UV radiation.  
341 However, given that anthocyanins and flavones perform a plethora of protective functions  
342 against many biotic and abiotic factors [28,60,61], they could be performing non-  
343 photoprotective functions. For example, isoorientins and isovitexins found in flax (*Linum*  
344 *usitatissimum*) enhance the resistance to fungal infections [62], and petal isovitexins of  
345 *Silene latifolia* help regulate vacuole homeostasis in epidermal cells, preventing petals from  
346 wilting [63]. In addition, flavones are produced constitutively in aboveground tissues of *S.*  
347 *littorea* when plants grow in low light levels conditions [40]. Thus, although anthocyanins  
348 and flavones are probably conferring protection against high levels of PAR, we cannot rule  
349 out that the selective pressures of other biotic and abiotic agents could explain the  
350 constitutive accumulation of flavonoids found in plants not exposed to UV stress.

351         The increase of flavonoid accumulation in response to UV radiation was not  
352 homogeneous across tissues: petals respond to UV by increasing anthocyanins, calyces and  
353 leaves respond by increasing flavones, and stems through both anthocyanin and flavones.  
354 This result is not surprising because the biosynthesis of flavonoids is tissue-specific regulated  
355 [64]. The depletion of anthocyanins in petals on the UV-absent treatment is translated in a  
356 change color intensity [65], which may be differentially perceived by the insect pollinators  
357 [66]. On the other hand, calyces of plants from both UV-exclusion and UV-present  
358 treatments of Sines population showed higher levels of flavones than those of Furnas in each  
359 treatment. This difference may reflect a local adaptation of flavones biosynthesis to the  
360 higher UV radiation of the Sines population compared with Furnas [39]. However, further

361 studies are necessary to assess whether flavonoid biosynthesis in *S. littorea* shows signals of  
362 local adaptation across the UV radiation gradient in the distribution area.

363

## 364 **Effects of UV radiation on photosynthetic performance**

365 *Silene littorea* showed a higher decline of the quantum efficiency of PSII when plants  
366 were exposed to UV stress, especially in leaves. Many authors have showed that the UV part  
367 of sunlight is potentially highly important in photoinhibition of PSII of leaves. For example,  
368 *Cucurbita pepo* leaves under UV stress exhibit a parallel decrease in photosynthetic activity  
369 [42]. In addition, Albert et al. [67] showed that the PSII performance and net photosynthesis  
370 of *Salix arctica*, is negatively affected by the ambient solar UV-B radiation. Given that *S.*  
371 *littorea* was more susceptible to photoinhibition when it is exposed to UV stress, our  
372 findings add evidences that the ambient solar UV radiation is a significant stress factor for  
373 the photosynthetic activity of plants.

374 Despite the negative effects of UV stress on the photosynthetic activity in *S. littorea*,  
375 this species seems to have an optimal light-stress recovery system and does not incur in  
376 chronic photoinhibition, expressed as *Fv/Fm* values within the range of healthy plants after  
377 relaxation of photoinactivation. In plants, when incident light surpasses the energy  
378 assimilated by the photosynthetic apparatus, the excessive energy causes photoinhibition  
379 and the formation of ROS, which results in photo-oxidative damage and an eventual decline  
380 in photosynthetic activity [15,28,68]. The photoprotection mechanism of plants involves a  
381 variety of defense agents against light-induced ROS, including the synthesis of antioxidant  
382 anthocyanins and flavonoids [12,13]. In this regard, dihydroxy B-ring-substituted flavonoids  
383 located in the chloroplasts help antioxidant enzymes to reduce light-induced ROS and those

384 diffusing out of the chloroplast are scavenged by vacuolar flavonoids [15]. In addition, leaves  
385 accumulating anthocyanins incur in less photoinhibition after a saturating light stress as  
386 compared with green leaves [27,69]. We hypothesized that flavonoids (both anthocyanins  
387 and flavones) of *S. littorea* may contribute to photoprotection to thrive in habitats with  
388 highly solar radiation such as coastal foredunes along the Iberian Peninsula [39]. Thus,  
389 flavonoid biosynthesis may be of particular benefit to *S. littorea* to prevent photoinhibition  
390 in this light-stressed habitat, as it was found in *Silene germana* [70].

391

## 392 **Effects of UV radiation on reproductive output**

393 Plants exposed to UV produced approximately three times less total number of seeds  
394 per plant than those shielded from UV, driven primarily by a decrease in total flower  
395 production. In a previous study, we found that flower production in *S. littorea* increases as a  
396 consequence of high natural sunlight levels [71], but exposure to sunlight also entails the  
397 exposure to harmful UV wavelengths. Here, we demonstrated that the absence of these  
398 harmful effects in the UV-exclusion treatment allows the absorption of PAR and enhances  
399 flower production. Although many studies often report enhanced flowering when plants  
400 were exposed to supplemental UV radiation (e.g. [72,73]), other studies have reported the  
401 opposite effect. For example, Feldheim and Conner [74] reported that supplemental UV-B  
402 radiation was generally detrimental to flowering in *Brassica nigra* and *B. rapa*, while plants  
403 from a lowland population of *Silene vulgaris* increase their flower production in the absence  
404 of UV-B [75].

405 Additionally, we found that the proportion of flowers yielding fruits was nearly  
406 double in plants under UV stress. Even though other studies have reported increasing

407 fecundity in plants exposed to moderate supplemental UV radiation [76], we suggest that  
408 significant differences in fruit set between light treatments could be influenced by the  
409 resources allocated to the high flower production of plants growing in the absence of UV  
410 stress. In addition, pollinators can become saturated at high flower densities [77,78],  
411 resulting in a decrease of per-flower visitation. Thus, despite the fact that absolute fruit  
412 production was almost four times higher in plants shielded from UV light, the elevated  
413 number of flowers of these plants not visited by pollinator may have led to a reduced fruit  
414 set. Experimental plants were fully accessible by pollinators around the study area (mostly  
415 hymenopterans), thus we can rule out that any architectural effect of the experiment might  
416 difficult pollinator visits.

417         Pollen production decreased in plants exposed to UV light is consistent with results in  
418 other species [36,37,79]. Since male gametes of plants are encased in pollen grains,  
419 decreasing pollen production is expected to have an adverse impact on male fitness of *S.*  
420 *littorea*. Conversely, ovule production was similar in plants from both light treatments.  
421 Ovules occur in ovaries, which are well protected against UV stress due to their  
422 accumulation of UV-absorbing compounds that attenuate UV radiation [7,33]. In *S. littorea*,  
423 upper anthers occur slightly beyond the corolla opening at anthesis and are more exposed to  
424 UV radiation, whereas carpophore is embedded in the calyx. Thus, ovule production is less  
425 likely to be compromised by solar radiation since ovules are protected from UV radiation by  
426 several layers of tissue.

427

## 428 **Conclusions**

429 UV radiation incurred a trade-off between flavonoid protection and reproduction in  
430 *S. littorea*. We propose that flavonoid production was activated as a defense mechanism  
431 against UV radiation, presumably because of their antioxidant nature, which may prevent  
432 the chronic photoinhibition and promote a rapid photosynthetic recovery. Conversely,  
433 exposure to UV radiation negatively affected flower and pollen production in this species.  
434 This balancing between protection and reproduction may be beneficial to successfully  
435 survive in exposed coastal foredunes. Thus, the allocation of metabolic resources may  
436 provide an efficient photoprotective toolkit and, at the same time, guarantee the  
437 reproduction of this species in Mediterranean climates subjected to strong UV radiation.

438

## 439 **Acknowledgments**

440 The authors thank to A. Gallardo for their laboratory assistance and A. Cardoso for  
441 her help at the greenhouse. We particularly thank the anonymous referees for their helpful  
442 comments. This work was supported by the Spanish Government MINECO projects  
443 (CGL2012-37646 and CGL2015-63827-P) and a Predoctoral Training Program grant to JCV  
444 (BES-2013-062610).

445

## 446 **References**

- 447 1. Koski MH, Ashman TL. Dissecting pollinator responses to a ubiquitous ultraviolet floral  
448 pattern in the wild. *Funct Ecol.* 2014;28: 868–877. doi:10.1111/1365-2435.12242
- 449 2. Frohnmeier H, Staiger D. Ultraviolet-B radiation-mediated responses in plants.  
450 Balancing damage and protection. *Plant Physiol.* 2003;133: 1420–1428.



- 451           doi:10.1104/pp.103.030049
- 452    3.    Paul ND, Gwynn-Jones D. Ecological roles of solar UV radiation: towards an integrated  
453           approach. *Trends Ecol Evol.* 2003;18: 48–55. doi:doi.org/10.1016/S0169-  
454           5347(02)00014-9
- 455    4.    Verdaguer D, Jansen MAK, Llorens L, Morales LO, Neugart S. UV-A radiation effects on  
456           higher plants: exploring the known unknown. *Plant Sci.* Elsevier Ireland Ltd; 2017;255:  
457           72–81. doi:10.1016/j.plantsci.2016.11.014
- 458    5.    Jansen MAK. Ultraviolet-B radiation effects on plants: induction of morphogenic  
459           responses. *Physiol Plant.* 2002;116: 423–429. doi:10.1034/j.1399-  
460           3054.2002.1160319.x
- 461    6.    Robson TM, Klem K, Urban O, Jansen MAK. Re-interpreting plant morphological  
462           responses to UV-B radiation. *Plant, Cell Environ.* 2015;38: 856–866.  
463           doi:10.1111/pce.12374
- 464    7.    Llorens L, Badenes-Pérez FR, Julkunen-Tiitto R, Zidorn C, Fereres A, Jansen MAK. The  
465           role of UV-B radiation in plant sexual reproduction. *Perspect Plant Ecol Evol Syst.*  
466           Elsevier GmbH.; 2015;17: 243–254. doi:10.1016/j.ppees.2015.03.001
- 467    8.    Mittler R. Oxidative stress, antioxidants and stress tolerance. *Trends Plant Sci.* 2002;7:  
468           405–410. doi:10.1016/S1360-1385(02)02312-9
- 469    9.    Takahashi S, Badger MR. Photoprotection in plants: a new light on photosystem II  
470           damage. *Trends Plant Sci.* Elsevier Ltd; 2011;16: 53–60.  
471           doi:10.1016/j.tplants.2010.10.001
- 472    10.   Köhler H, Contreras RA, Pizarro M, Cortés-Antíquera R, Zúñiga GE. Antioxidant  
473           responses induced by UVB radiation in *Deschampsia antarctica* Desv. *Front Plant Sci.*

- 474 2017;8: 921. doi:10.3389/fpls.2017.00921
- 475 11. Treutter D. Significance of flavonoids in plant resistance: a review. *Environ Chem Lett.*  
476 2006;4: 147–157. doi:10.1007/s10311-006-0068-8
- 477 12. Pollastri S, Tattini M. Flavonols: old compounds for old roles. *Ann Bot.* 2011;108:  
478 1225–1233. doi:10.1093/aob/mcr234
- 479 13. Agati G, Azzarello E, Pollastri S, Tattini M. Flavonoids as antioxidants in plants: location  
480 and functional significance. *Plant Sci. Elsevier Ireland Ltd*; 2012;196: 67–76.  
481 doi:10.1016/j.plantsci.2012.07.014
- 482 14. Harborne JB, Williams CA. Advances in flavonoid research since 1992. *Phytochemistry.*  
483 2000;55: 481–504. doi:10.1016/S0031-9422(00)00235-1
- 484 15. Agati G, Brunetti C, Di Ferdinando M, Ferrini F, Pollastri S, Tattini M. Functional roles  
485 of flavonoids in photoprotection: new evidence, lessons from the past. *Plant Physiol*  
486 *Biochem. Elsevier Masson SAS*; 2013;72: 35–45. doi:10.1016/j.plaphy.2013.03.014
- 487 16. Tattini M, Gravano E, Pinelli P, Mulinacci N, Romani A. Flavonoids accumulate in  
488 leaves and glandular trichomes of *Phillyrea latifolia* exposed to excess solar radiation.  
489 *New Phytol.* 2000;148: 69–77. doi:10.1046/j.1469-8137.2000.00743.x
- 490 17. Tattini M, Galardi C, Pinelli P, Massai R, Remorini D, Agati G. Differential accumulation  
491 of flavonoids and hydroxycinnamates in leaves of *Ligustrum vulgare* under excess light  
492 and drought stress. *New Phytol.* 2004;163: 547–561. doi:10.1111/j.1469-  
493 8137.2004.01126.x
- 494 18. Barnes PW, Flint SD, Tobler MA, Ryel RJ. Diurnal adjustment in ultraviolet sunscreen  
495 protection is widespread among higher plants. *Oecologia. Springer Berlin Heidelberg*;  
496 2016;181: 55–63. doi:10.1007/s00442-016-3558-9

- 497 19. Agati G, Tattini M. Multiple functional roles of flavonoids in photoprotection. *New*  
498 *Phytol.* 2010;186: 786–793. doi:10.1111/j.1469-8137.2010.03269.x
- 499 20. Burchard P, Bilger W, Weissenböck G. Contribution of hydroxycinnamates and  
500 flavonoids to, epidermal shielding of UV-A and UV-B radiation in developing rye  
501 primary leaves as assessed by ultraviolet-induced chlorophyll fluorescence  
502 measurements. *Plant, Cell Environ.* 2000;23: 1373–1380. doi:10.1046/j.1365-  
503 3040.2000.00633.x
- 504 21. Bidet LPR, Chomicki G, Bonini F, Mondolot L, Soulé J, Coumans M, et al. Dynamics of  
505 flavonol accumulation in leaf tissues under different UV-B regimes in *Centella asiatica*  
506 (Apiaceae). *Planta.* 2015;242: 545–559. doi:10.1007/s00425-015-2291-7
- 507 22. Mouradov A, Spangenberg G. Flavonoids: a metabolic network mediating plants  
508 adaptation to their real estate. *Front Plant Sci.* 2014;5: 620.  
509 doi:10.3389/fpls.2014.00620
- 510 23. Gould KS, Lee DW. Anthocyanins in leaves. Gould KS, Lee DW, editors. London, UK:  
511 Academic Press; 2002. doi:10.1016/S0065-2296(05)42003-0
- 512 24. Steyn WJ, Wand SJE, Holcroft DM, Jacobs G. Anthocyanins in vegetative tissues: a  
513 proposed unified function in photoprotection. *New Phytol.* 2002;155: 349–361.  
514 doi:10.1046/j.1469-8137.2002.00482.x
- 515 25. Manetas Y, Petropoulou Y, Psaras GK, Drinia A. Exposed red (anthocyanic) leaves of  
516 *Quercus coccifera* display shade characteristics. *Funct Plant Biol.* 2003;30: 265–270.  
517 doi:10.1071/FP02226
- 518 26. Neill S, Gould KS. Optical properties of leaves in relation to anthocyanin concentration  
519 and distribution. *Can J Bot.* 1999;77: 1777–1782. doi:10.1139/b99-153

- 520 27. Tattini M, Landi M, Brunetti C, Giordano C, Remorini D, Gould KS, et al. Epidermal  
521 coumaroyl anthocyanins protect sweet basil against excess light stress: multiple  
522 consequences of light attenuation. *Physiol Plant*. 2014;152: 585–598.  
523 doi:10.1111/ppl.12201
- 524 28. Landi M, Tattini M, Gould KS. Multiple functional roles of anthocyanins in plant-  
525 environment interactions. *Environ Exp Bot*. Elsevier B.V.; 2015;119: 4–17.  
526 doi:10.1016/j.envexpbot.2015.05.012
- 527 29. Bi X, Zhang J, Chen C, Zhang D, Li P, Ma F. Anthocyanin contributes more to hydrogen  
528 peroxide scavenging than other phenolics in apple peel. *Food Chem*. Elsevier Ltd;  
529 2014;152: 205–209. doi:10.1016/j.foodchem.2013.11.088
- 530 30. Zhou B, Li Y, Xu Z, Yan H, Homma S, Kawabata S. Ultraviolet A-specific induction of  
531 anthocyanin biosynthesis in the swollen hypocotyls of turnip (*Brassica rapa*). *J Exp*  
532 *Bot*. 2007;58: 1771–1781. doi:10.1093/jxb/erm036
- 533 31. Von Wettberg EJ, Stanton ML, Whittall JB. How anthocyanin mutants respond to  
534 stress: the need to distinguish between stress tolerance and maximal vigour. *Evol Ecol*  
535 *Res*. 2010;12: 457–476.
- 536 32. Rozema J, Noordijk AJ, Broekman RA, Van Beem A, Meijkamp BM, De Bakker NVJ, et  
537 al. (Poly)phenolic compounds in pollen and spores of Antarctic plants as indicators of  
538 solar UV-B: A new proxy for the reconstruction of past solar UV-B? *Plant Ecol*.  
539 2001;154: 11–26.
- 540 33. Day A, Demchik SM. Ultraviolet-B radiation screening effectiveness of reproductive  
541 organs in *Hesperis matronalis*. *Environ Exp Bot*. 1996;36: 447–454. doi:10.1016/0098-  
542 8472(95)00048-8

- 543 34. Koski MH, Ashman TL. Floral pigmentation patterns provide an example of Gloger's  
544 rule in plants. *Nat Plants*. Nature Publishing Group; 2015;1: 14007.  
545 doi:10.1038/nplants.2014.7
- 546 35. Petropoulou Y, Georgiou O, Psaras GK, Manetas Y. Improved flower advertisement,  
547 pollinator rewards and seed yield by enhanced UV-B radiation in the Mediterranean  
548 annual *Malcolmia maritima*. *New Phytol*. 2001;152: 85–90. doi:10.1046/j.0028-  
549 646X.2001.00241.x
- 550 36. Koti S, Reddy KR, Reddy VR, Kakani VG, Zhao D. Interactive effects of carbon dioxide,  
551 temperature, and ultraviolet-B radiation on soybean (*Glycine max* L.) flower and  
552 pollen morphology, pollen production, germination, and tube lengths. *J Exp Bot*.  
553 2005;56: 725–736. doi:10.1093/jxb/eri044
- 554 37. Demchik SM, Day TA. Effect of enhanced UV-B radiation of pollen quantity, quality,  
555 and seed yield in *Brassica rapa* (Brassicaceae). *Am J Bot*. 1996;83: 573–579.
- 556 38. Del Valle JC, Alcalde-Eon C, Escribano-Bailón MT, Buide ML, Whittall JB, Narbona E.  
557 Stability of petal color polymorphism: the significance of anthocyanin accumulation in  
558 photosynthetic tissues. *BMC Plant Biol*. 2019;19: 496. doi:10.1186/s12870-019-2082-6
- 559 39. Del Valle JC, Buide ML, Casimiro-Soriguer I, Whittall JB, Narbona E. On flavonoid  
560 accumulation in different plant parts: variation patterns among individuals and  
561 populations in the shore campion (*Silene littorea*). *Front Plant Sci*. 2015;6: 939.  
562 doi:10.3389/fpls.2015.00939
- 563 40. Del Valle JC, Buide ML, Whittall JB, Narbona E. Phenotypic plasticity in light-induced  
564 flavonoids varies among tissues in *Silene littorea* (Caryophyllaceae). *Environ Exp Bot*.  
565 2018;153. doi:10.1016/j.envexpbot.2018.05.014

- 566 41. Hofmann RW, Jahufer MZZ. Tradeoff between biomass and flavonoid accumulation in  
567 white clover reflects contrasting plant strategies. *PLoS One*. 2011;6: e18949.  
568 doi:10.1371/journal.pone.0018949
- 569 42. Hakala-Yatkin M, Mntysaari M, Mattila H, Tyystjärvi E. Contributions of visible and  
570 ultraviolet parts of sunlight to photoinhibition. *Plant Cell Physiol*. 2010;51: 1745–  
571 1753. doi:10.1093/pcp/pcq133
- 572 43. Gould KS, Markham KR, Smith RH, Goris JJ. Functional role of anthocyanins in the  
573 leaves of *Quintinia serrata* A. Cunn. *J Exp Bot*. 2000;51: 1107–1115.  
574 doi:10.1093/jexbot/51.347.1107
- 575 44. Aragón CF, Escudero A, Valladares F. Stress-induced dynamic adjustments of  
576 reproduction differentially affect fitness components of a semi-arid plant. *J Ecol*.  
577 2008;96: 222–229. doi:10.1111/j.1365-2745.2007.01320.x
- 578 45. Narbona E, Ortiz PL, Arista M. Linking self-incompatibility, dichogamy, and flowering  
579 synchrony in two *Euphorbia* species: alternative mechanisms for avoiding self-  
580 fertilization? *PLoS One*. 2011;6: e20668. doi:10.1371/journal.pone.0020668
- 581 46. Hothorn T, Bretz F, Westfall P. Simultaneous inference in general parametric models.  
582 *Biometrical J*. 2008;50: 346–363. doi:10.1002/bimj.200810425
- 583 47. Crawley MJ. *The R Book*. Chichester, U.K.: John Wiley; 2007.
- 584 48. Rice WR. Analyzing tables of statistical tests. *Evolution*. 1989;43: 223–225.  
585 doi:10.2307/2409177
- 586 49. R Core Team. *R: a language and environment for statistical computing* [Internet].  
587 Vienna, Austria; 2017. Available: <http://www.r-project.org>
- 588 50. Bates D, Mächler M, Bolker B, Walker S. Fitting linear mixed-effects models using

- 589 lme4. J Stat Softw. 2015;67: 1–48. doi:10.18637/jss.v067.i01
- 590 51. Rice-Evans C, Miller N, Paganga G. Antioxidant properties of phenolic compounds.  
591 Trends Plant Sci. 1997;2: 152–159. doi:10.1016/S1360-1385(97)01018-2
- 592 52. Brown JE, Khodr H, Hider RC, Rice-Evans CA. Structural dependence of flavonoid  
593 interactions with Cu<sup>2+</sup> ions: implications for their antioxidant properties. Biochem J.  
594 1998;330: 1173–1178. doi:10.1042/bj3301173
- 595 53. Agati G, Matteini P, Goti A, Tattini M. Chloroplast-located flavonoids can scavenge  
596 singlet oxygen. New Phytol. 2007;174: 77–89. doi:10.1111/j.1469-8137.2007.01986.x
- 597 54. Hofmann RW, Campbell BD, Bloor SJ, Swinny EE, Markham KR, Ryan KG, et al.  
598 Responses to UV-B radiation in *Trifolium repens* L. - physiological links to plant  
599 productivity and water availability. Plant, Cell Environ. 2003;26: 603–612.  
600 doi:10.1046/j.1365-3040.2003.00996.x
- 601 55. Andersen ØM, Jordheim M, Byamukama R, Mbabazi A, Ogweng G, Skaar I, et al.  
602 Anthocyanins with unusual furanose sugar (apiose) from leaves of *Synadenium grantii*  
603 (Euphorbiaceae). Phytochemistry. 2010;71: 1558–1563.  
604 doi:10.1016/j.phytochem.2010.05.025
- 605 56. Davies KM, Albert NW, Zhou Y, Schwinn KE. Functions of flavonoid and betalain  
606 pigments in abiotic stress tolerance in plants. Annu Plant Rev. 2018;1: 1–41.  
607 doi:10.1002/9781119312994.apr0604
- 608 57. Tattini M, Matteini P, Saracini E, Traversi ML, Giordano C, Agati G. Morphology and  
609 biochemistry of non-glandular trichomes in *Cistus salvifolius* L. leaves growing in  
610 extreme habitats of the Mediterranean basin. Plant Biol. 2007;9: 411–419.  
611 doi:10.1055/s-2006-924662

- 612 58. Neugart S, Fiol M, Schreiner M, Rohn S, Zrenner R, Kroh LW, et al. Low and moderate  
613 photosynthetically active radiation affects the flavonol glycosides and  
614 hydroxycinnamic acid derivatives in kale (*Brassica oleracea* var. *sabellica*) dependent  
615 on two low temperatures. *Plant Physiol Biochem*. Elsevier Masson SAS; 2013;72: 161–  
616 168. doi:10.1016/j.plaphy.2013.04.002
- 617 59. Götz M, Albert A, Stich S, Heller W, Scherb H, Krins A, et al. PAR modulation of the UV-  
618 dependent levels of flavonoid metabolites in *Arabidopsis thaliana* (L.) Heynh. leaf  
619 rosettes: cumulative effects after a whole vegetative growth period. *Protoplasma*.  
620 2010;243: 95–103. doi:10.1007/s00709-009-0064-5
- 621 60. Gould KS, Davies KM, Winefield C. Anthocyanins: Biosynthesis, Functions, and  
622 Applications. Gould K, Davies KM, Winefield C, editors. New York, NY: Springer; 2009.
- 623 61. Jiang N, Doseff A, Grotewold E. Flavones: from biosynthesis to health benefits. *Plants*.  
624 2016;5: 27. doi:10.3390/plants5020027
- 625 62. Mierziak J, Wojtasik W, Kostyn K, Czuj T, Szopa J, Kulma A. Crossbreeding of transgenic  
626 flax plants overproducing flavonoids and glucosyltransferase results in progeny with  
627 improved antifungal and antioxidative properties. *Mol Breed*. 2014;34: 1917–1932.  
628 doi:10.1007/s11032-014-0149-5
- 629 63. van Brederode J, van Genderen HH, Berendsen W. Morphological effects of the  
630 flavone isovitexin in a non-glycosylating genotype of *Silene pratensis*  
631 (Caryophyllaceae). *Experientia*. 1982;38: 929–931. doi:10.1007/BF01953658
- 632 64. Albert NW, Davies KM, Lewis DH, Zhang HB, Montefiori M, Brendolise C, et al. A  
633 conserved network of transcriptional activators and repressors regulates anthocyanin  
634 pigmentation in eudicots. *Plant Cell*. 2014;26: 962–980. doi:10.1105/tpc.113.122069



- 635 65. Del Valle JC, Gallardo-López A, Buide ML, Whittall JB, Narbona E. Digital photography  
636 provides a fast, reliable, and noninvasive method to estimate anthocyanin pigment  
637 concentration in reproductive and vegetative plant tissues. *Ecol Evol.* 2018;8: 3064–  
638 3076. doi:10.1002/ece3.3804
- 639 66. Papiorek S, Rohde K, Lunau K. Bees' subtle colour preferences: How bees respond to  
640 small changes in pigment concentration. *Naturwissenschaften.* 2013;100: 633–643.  
641 doi:10.1007/s00114-013-1060-3
- 642 67. Albert KR, Mikkelsen TN, Ro-Poulsen H, Arndal MF, Michelsen A. Ambient UV-B  
643 radiation reduces PSII performance and net photosynthesis in high Arctic *Salix arctica*.  
644 *Environ Exp Bot.* Elsevier B.V.; 2011;73: 10–18. doi:10.1016/j.envexpbot.2011.08.003
- 645 68. Jenkins GI. Signal transduction in responses to UV-B radiation. *Annu Rev Plant Biol.*  
646 2009;60: 407–431. doi:10.1146/annurev.arplant.59.032607.092953
- 647 69. Nielsen SL, Simonsen AM. Photosynthesis and photoinhibition in two differently  
648 coloured varieties of *Oxalis triangularis* - the effect of anthocyanin content.  
649 *Photosynthetica.* 2011;49: 346–352. doi:10.1007/s11099-011-0042-y
- 650 70. Narbona E, Jaca J, del Valle JC, Valladares F, Buide ML. Whole-plant reddening in  
651 *Silene germana* is due to anthocyanin accumulation in response to visible light. *Plant*  
652 *Biol.* 2018;20: 968–977. doi:10.1111/plb.12875
- 653 71. Buide ML, Del Valle JC, Castilla AR, Narbona E. Sex expression variation in response to  
654 shade in gynodioecious-gynomonoecious species: *Silene littorea* decreases flower  
655 production and increases female flower proportion. *Environ Exp Bot.* 2018;146: 54–  
656 61. doi:10.1016/j.envexpbot.2017.10.016
- 657 72. Day TA, Demchik SM. Influence of enhanced UV-B radiation on biomass allocation and

- 658 pigment concentrations in leaves and reproductive structures of greenhouse-grown  
659 *Brassica rapa*. *Vegetatio*. 1996;127: 109–116. doi:10.1007/BF00044635
- 660 73. Day TA, Ruhland CT, Xiong FS. Influence of solar ultraviolet-B radiation on Antarctic  
661 terrestrial plants: results from a 4-year field study. *J Photochem Photobiol B Biol*.  
662 2001;62: 78–87. doi:10.1016/S1011-1344(01)00161-0
- 663 74. Feldheim K, Conner JK. The effects of increased UV-B radiation on growth, pollination  
664 success, and lifetime female fitness in two *Brassica* species. *Oecologia*. 1996;106:  
665 284–297. doi:10.1007/BF00334556
- 666 75. van de Staaij JWM, Bolink E, Rozema J, Ernst WHO. The impact of elevated UV-B (280-  
667 320 nm) radiation levels on the reproductive biology of a highland and a lowland  
668 population of *Silene vulgaris*. *Plant Ecol*. 1997;128: 173–179.  
669 doi:10.1023/A:1009710907336
- 670 76. Stephanou M, Manetas Y. Enhanced UV-B radiation increases the reproductive effort  
671 in the Mediterranean shrub *Cistus creticus* under field conditions. *Plant Ecol*.  
672 1998;134: 91–96. doi:10.1023/A:1009773105854
- 673 77. Rathcke BJ. Competition and facilitation among plants for pollination. In: Real LA,  
674 editor. *Pollination biology*. Orlando, FL: Academic Press; 1983. pp. 305–329.
- 675 78. Essenberg CJ. Explaining variation in the effect of floral density on pollinator visitation.  
676 *Am Nat*. 2012;180: 153–166. doi:10.1086/666610
- 677 79. Feng H, An L, Tan L, Hou Z, Wang X. Effect of enhanced ultraviolet-B radiation on  
678 pollen germination and tube growth of 19 taxa in vitro. *Environ Exp Bot*. 2000;43: 45–  
679 53. doi:10.1016/S0098-8472(99)00042-8
- 680

681 **Supporting information**

682 **S1 Table. Number of plants for each maternal genotype, population and treatment (UV-**  
683 **present and UV-exclusion treatments).** The number of plants sampled for anthocyanin and  
684 flavone concentration is indicated in parentheses.

685

686 **S2 Table. Pearson correlation coefficients for the comparison between flavonoid**  
687 **production (anthocyanins and flavones) in each plant tissue and reproductive outputs of *S.***  
688 ***littorea*.**

bioRxiv preprint doi: <https://doi.org/10.1101/2020.03.30.016295>; this version posted March 30, 2020. The copyright holder for this preprint (which was not certified by peer review) is the author/funder, who has granted bioRxiv a license to display the preprint in perpetuity. It is made available under aCC-BY 4.0 International license.

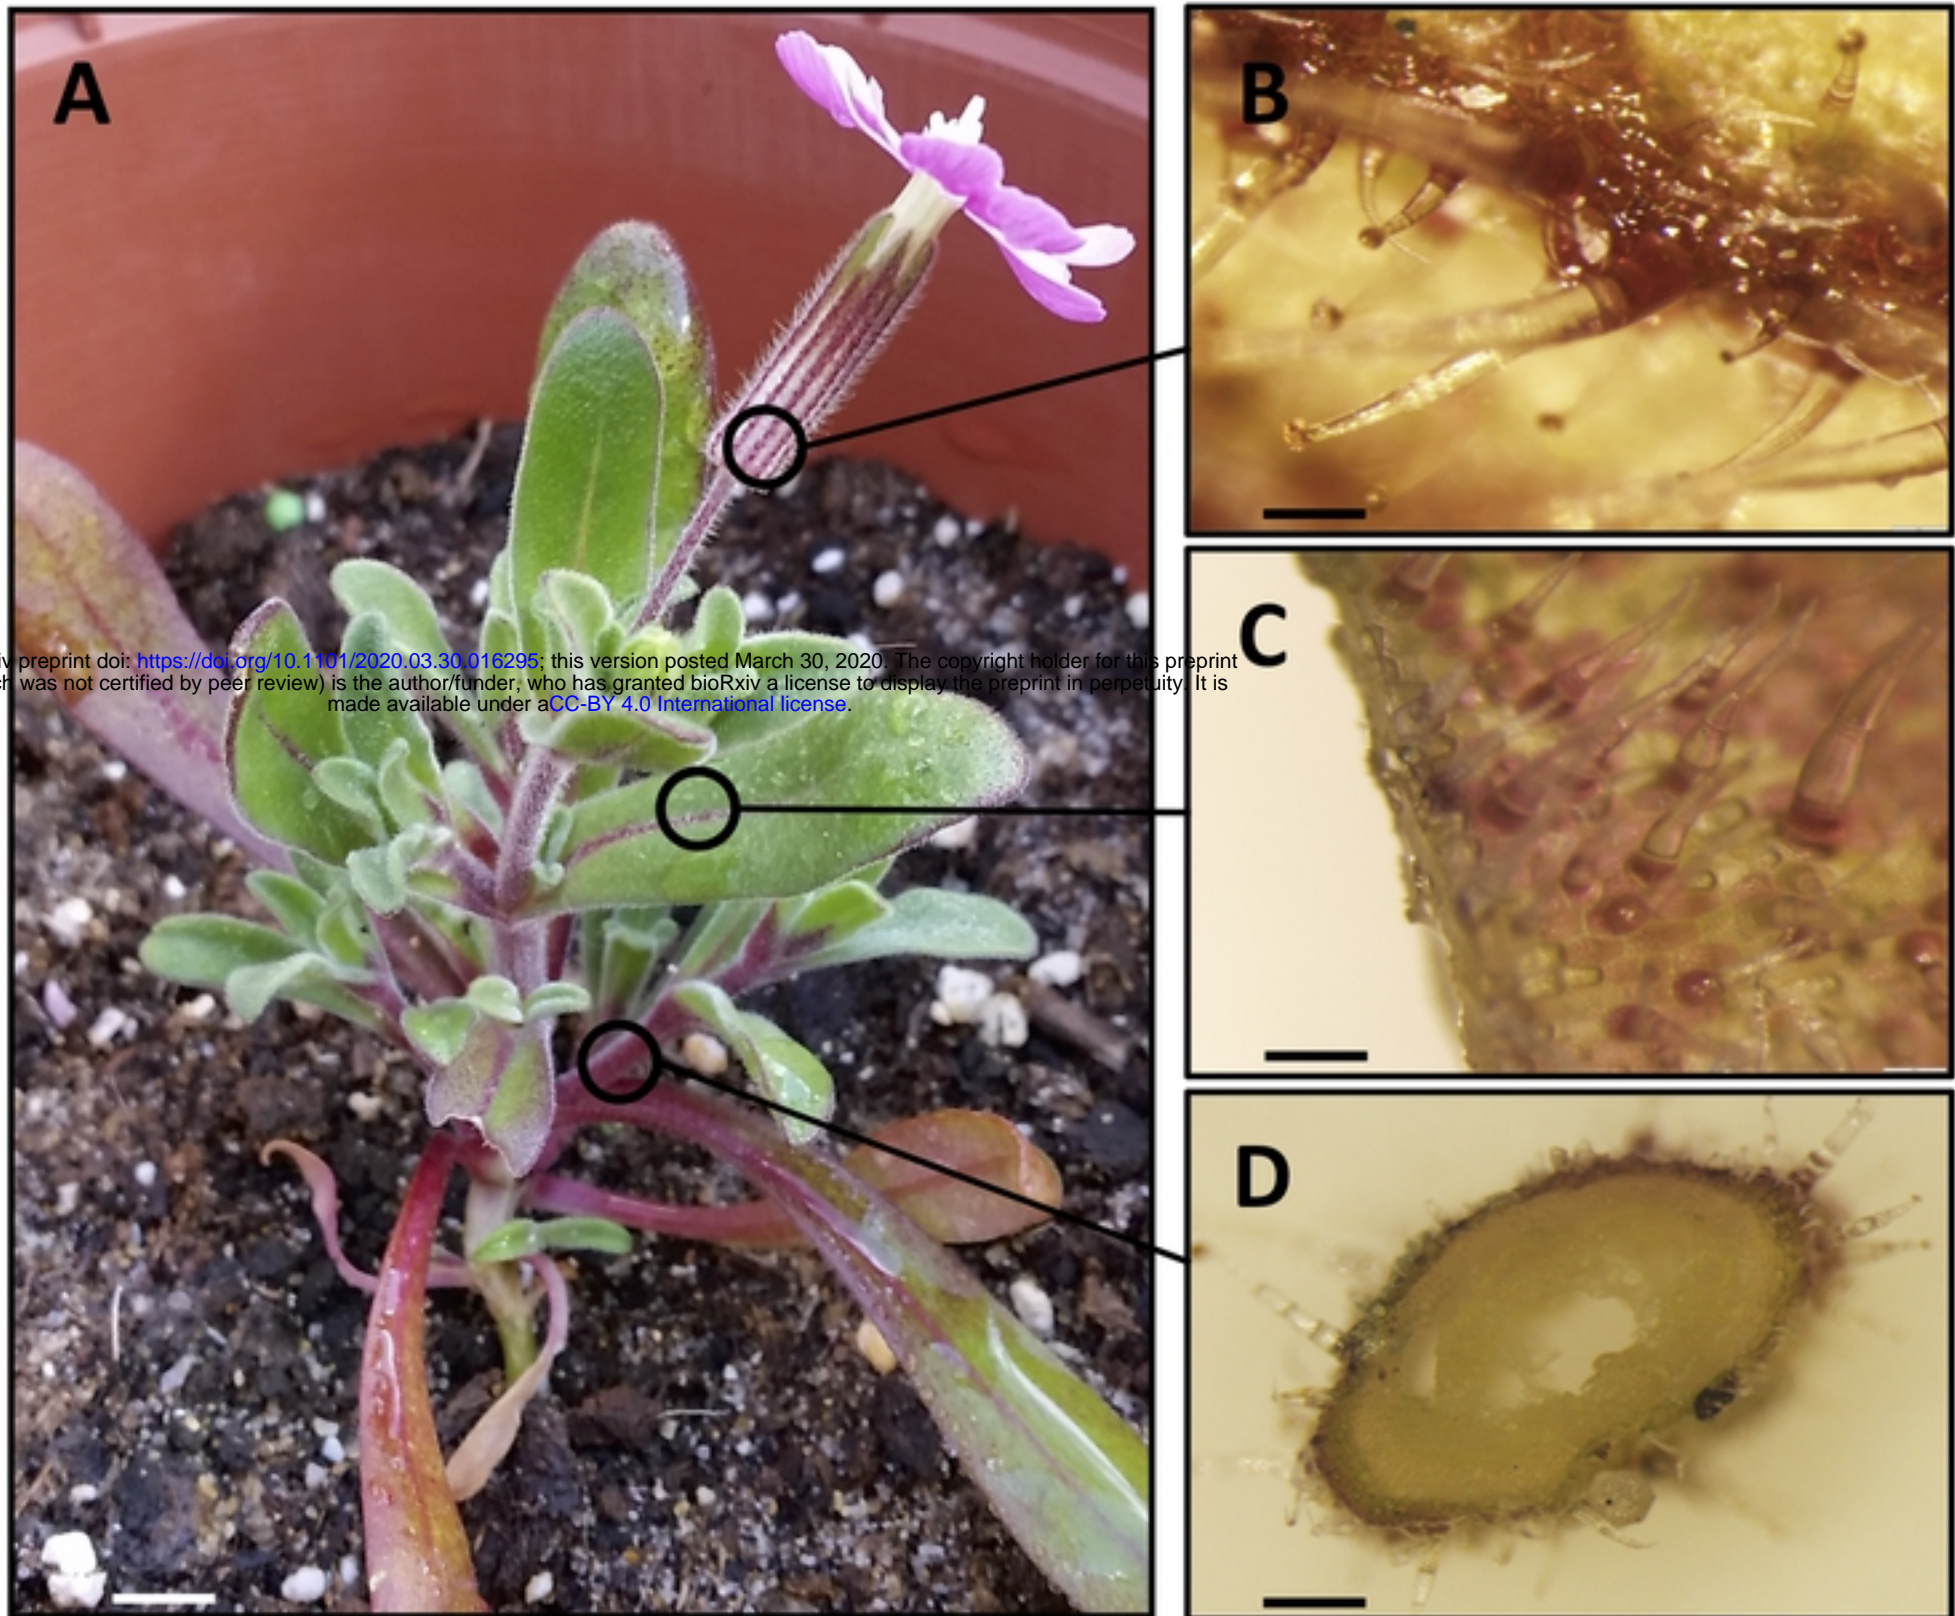

Figure 1



## Anthocyanins

## Flavones

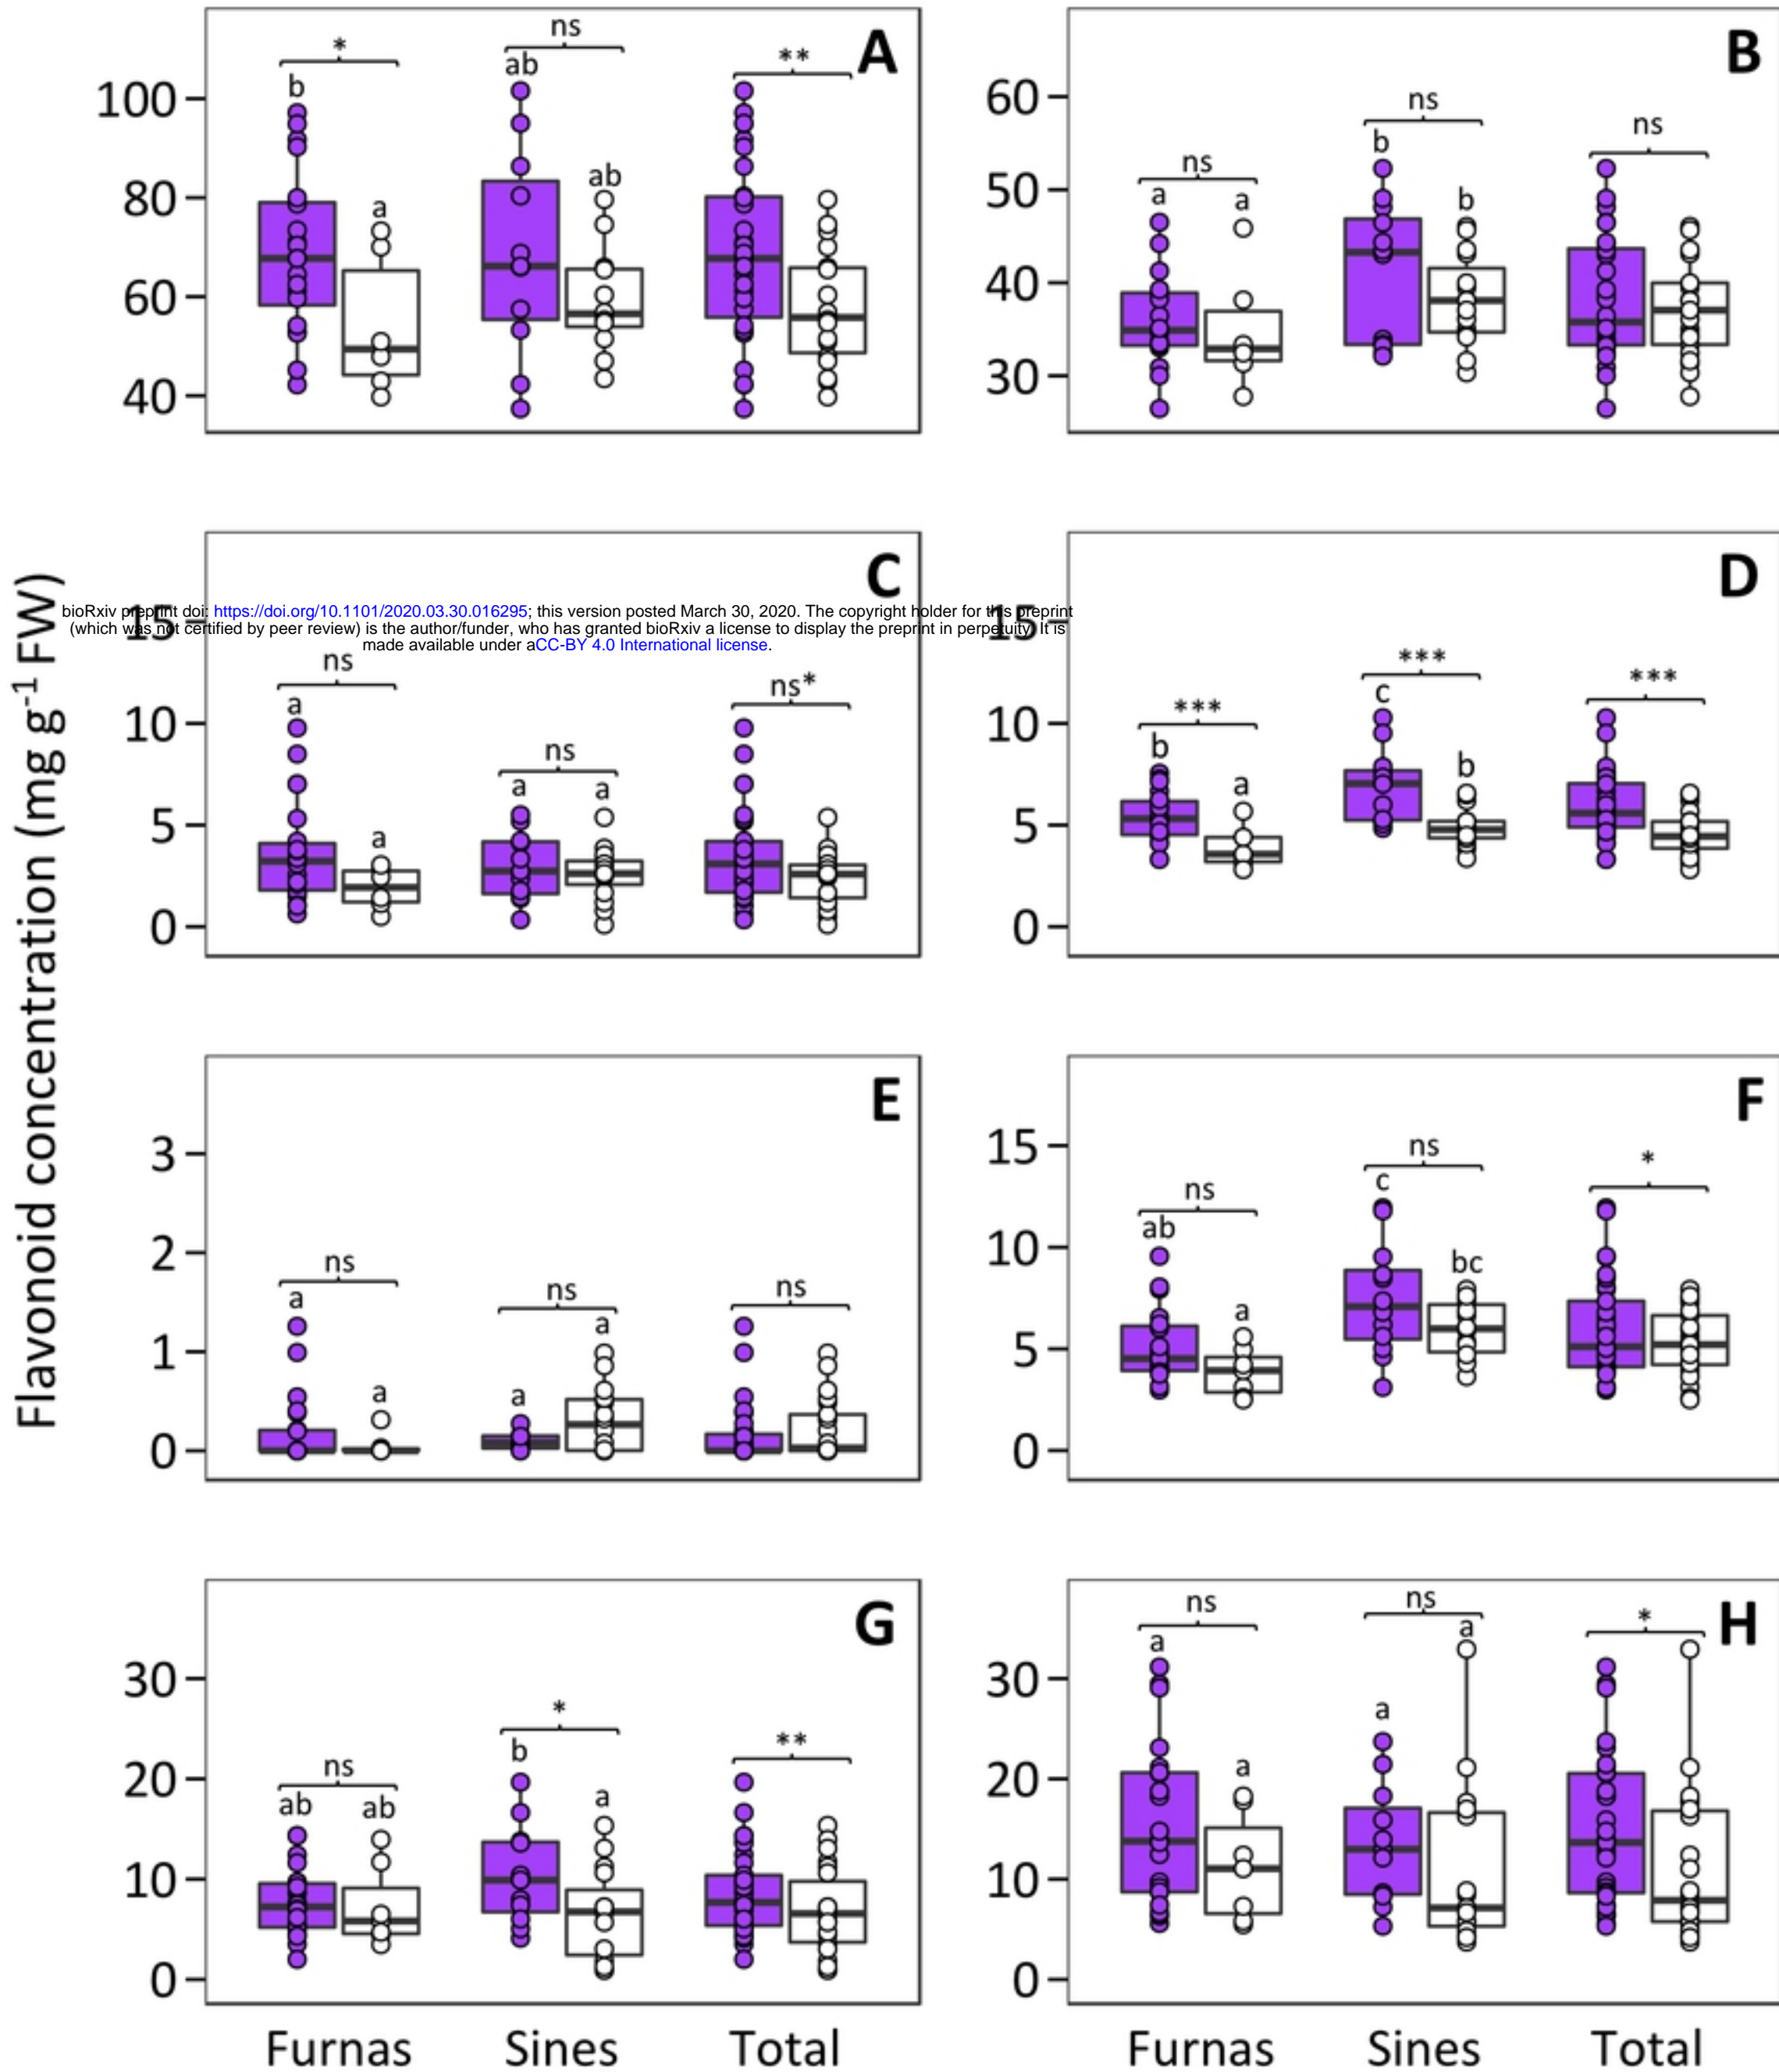

Figure 2

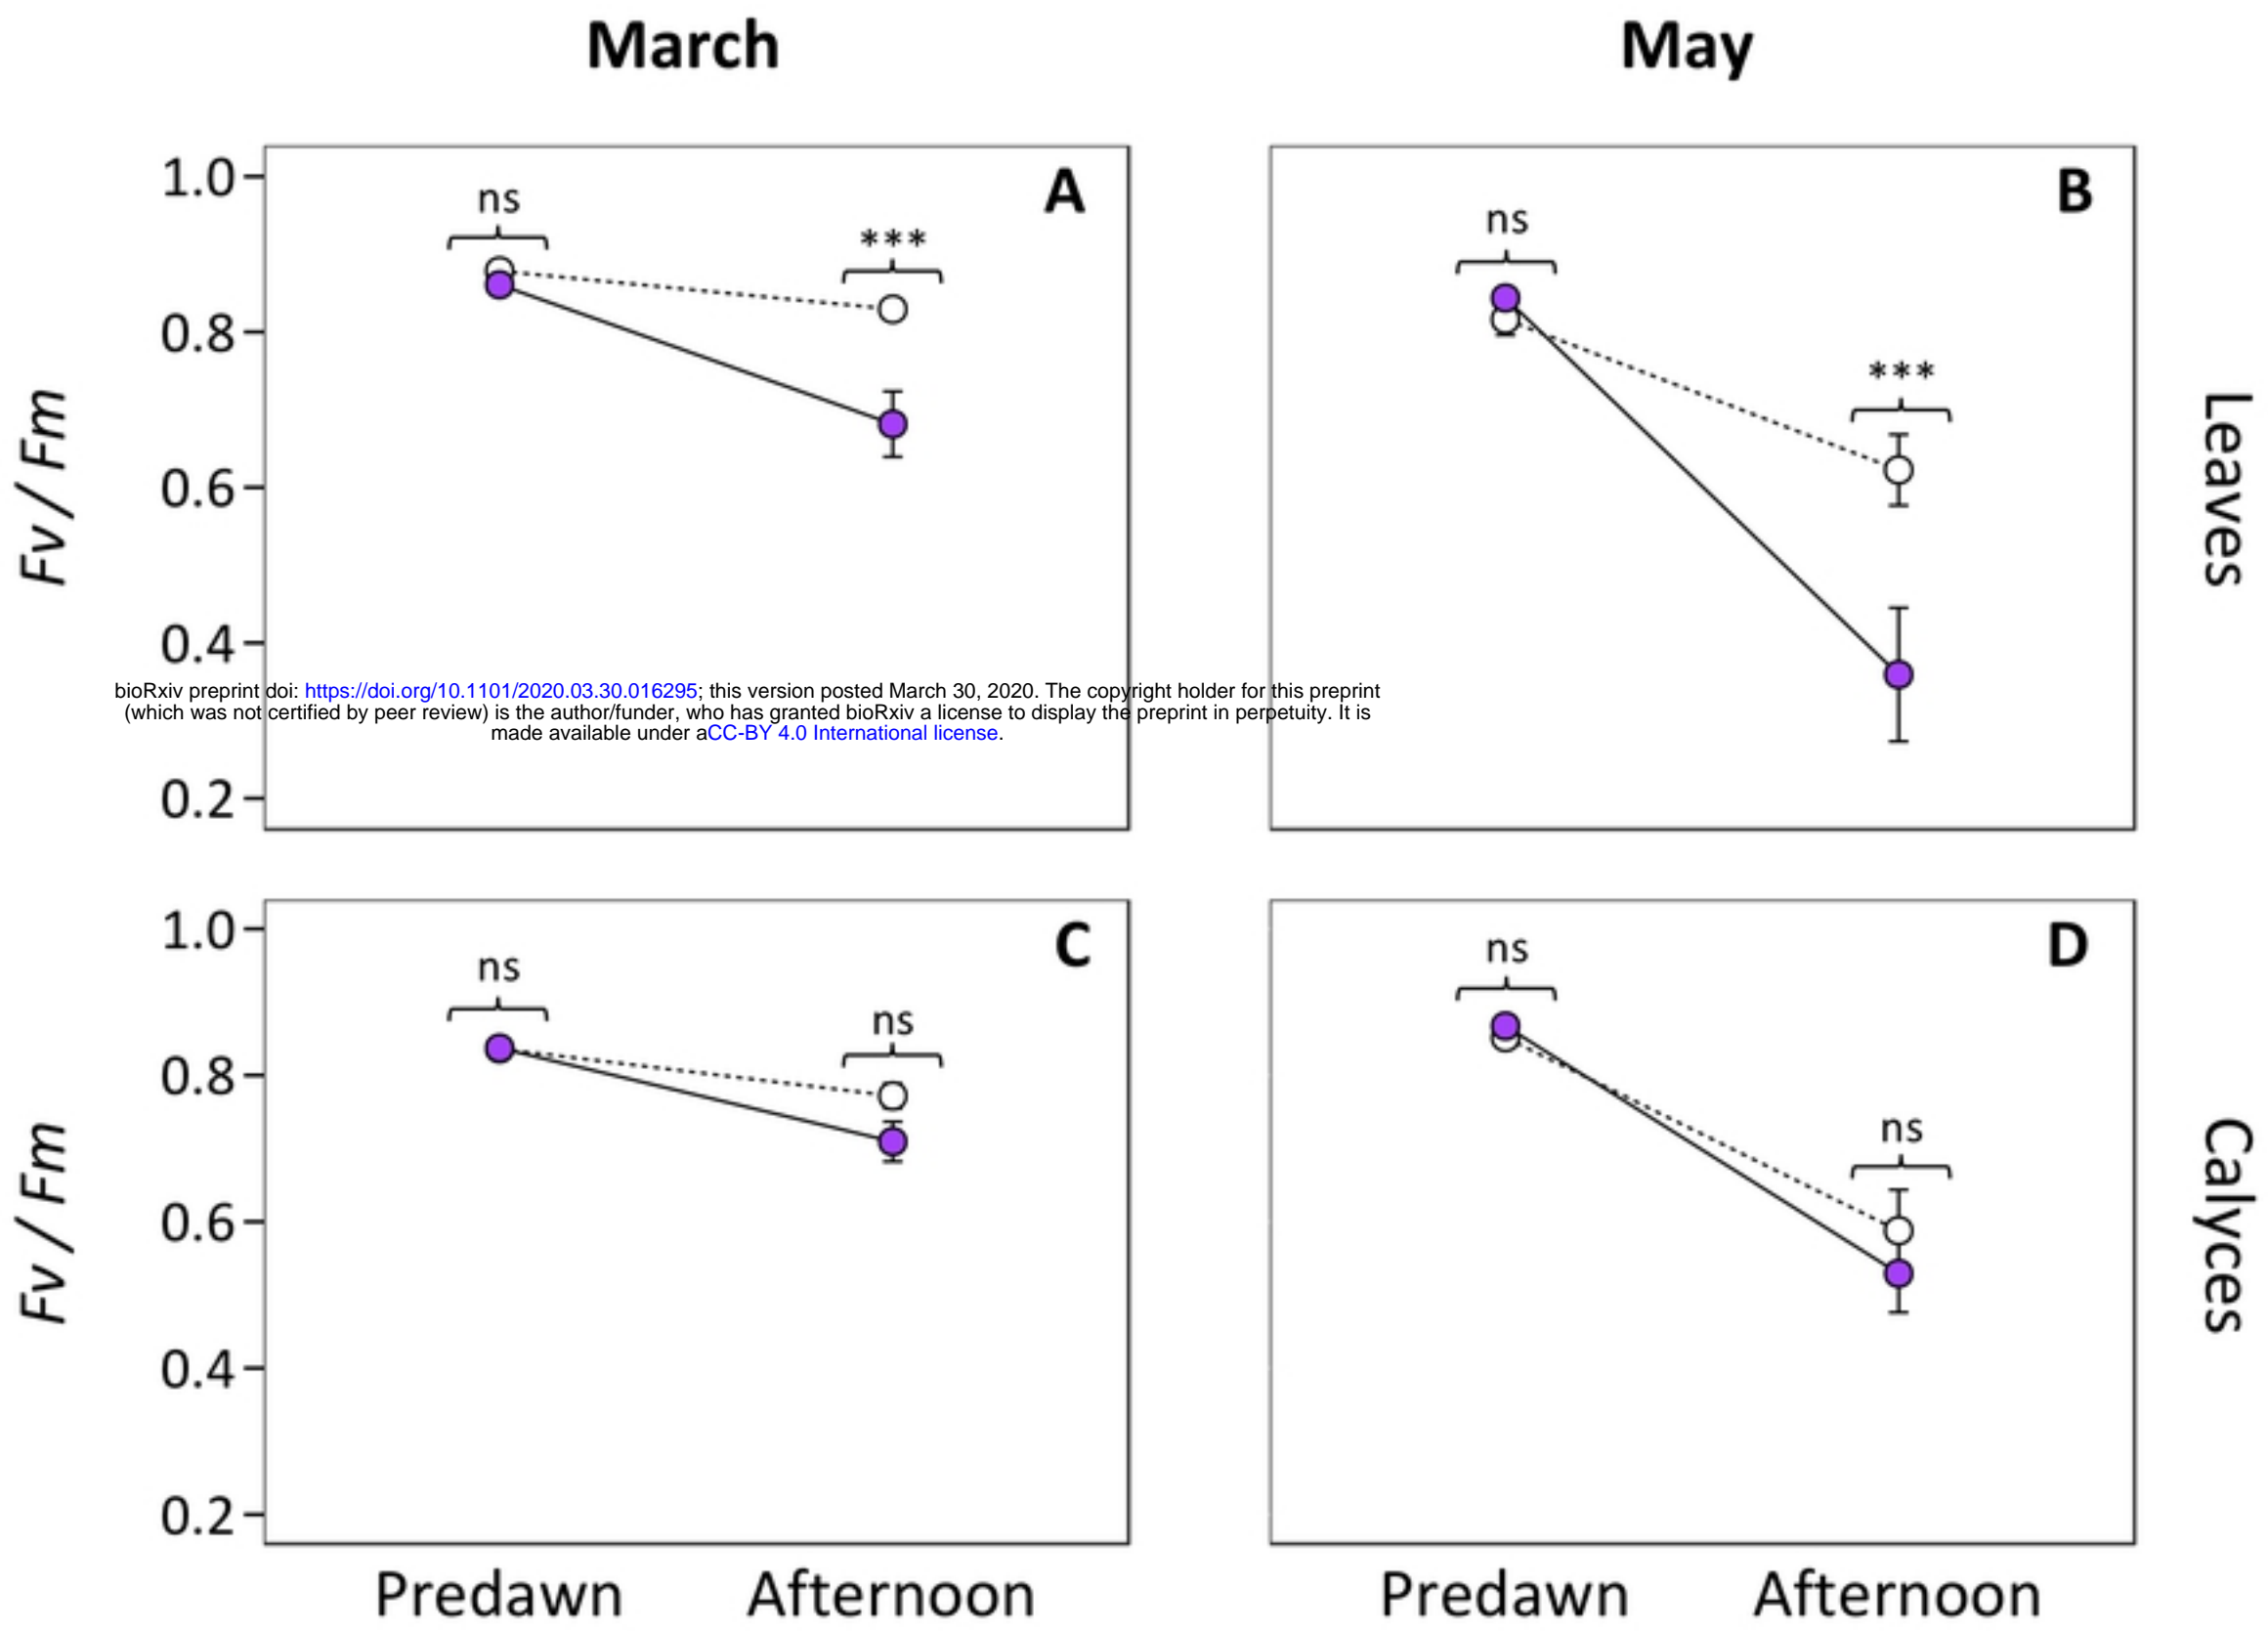

Figure3

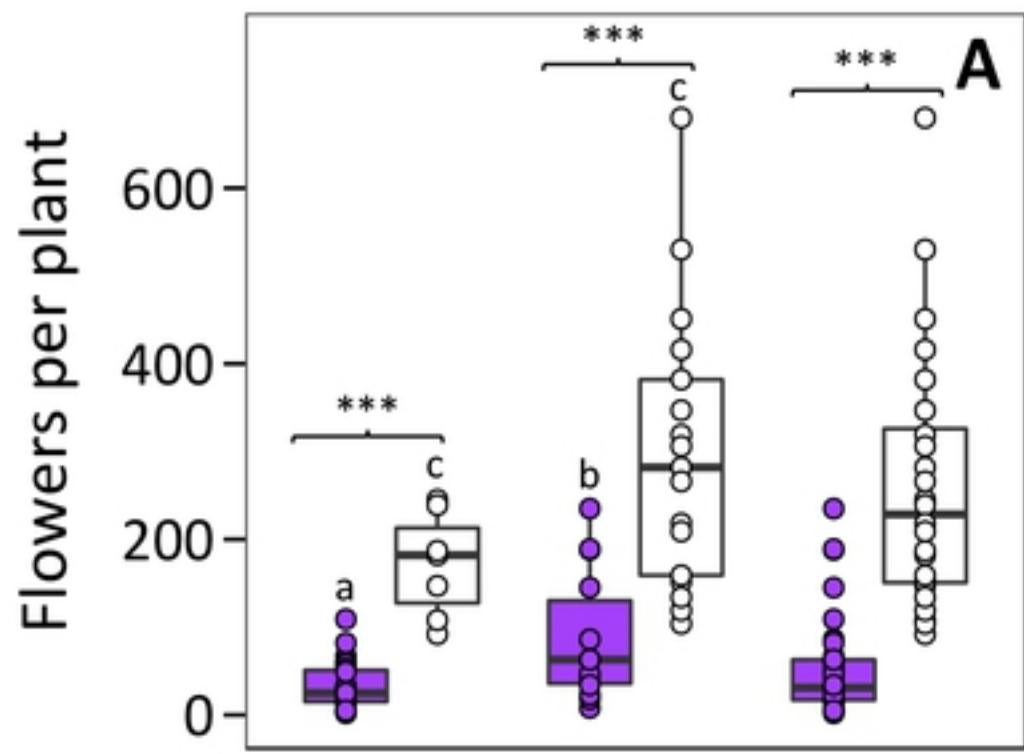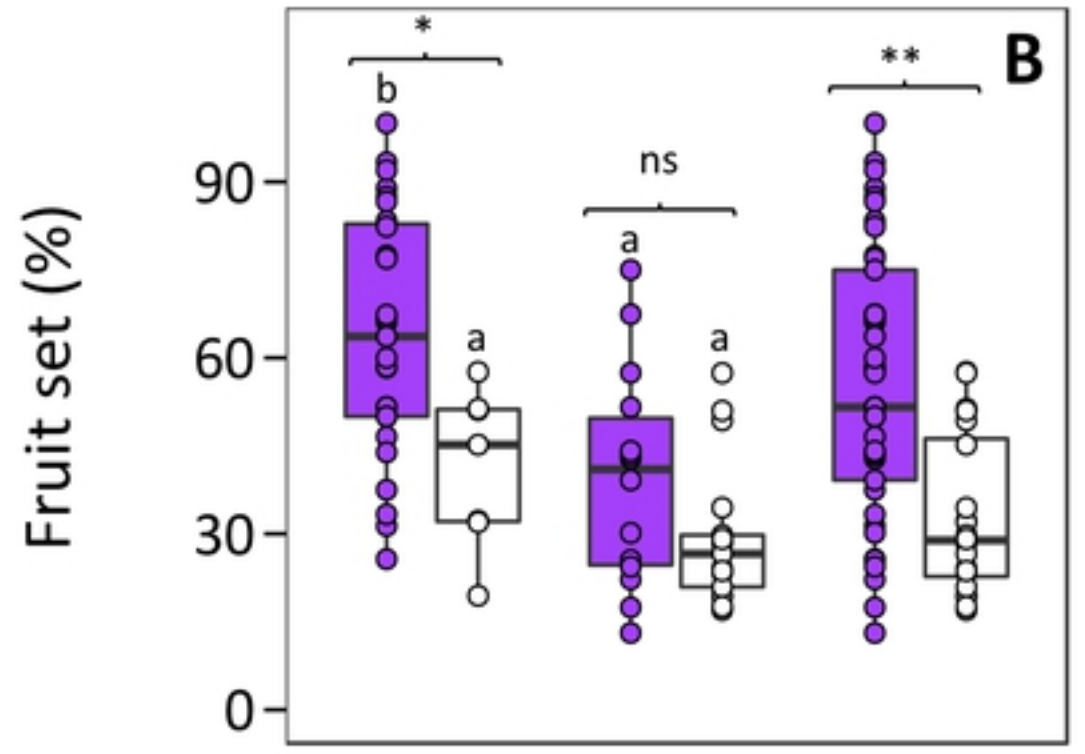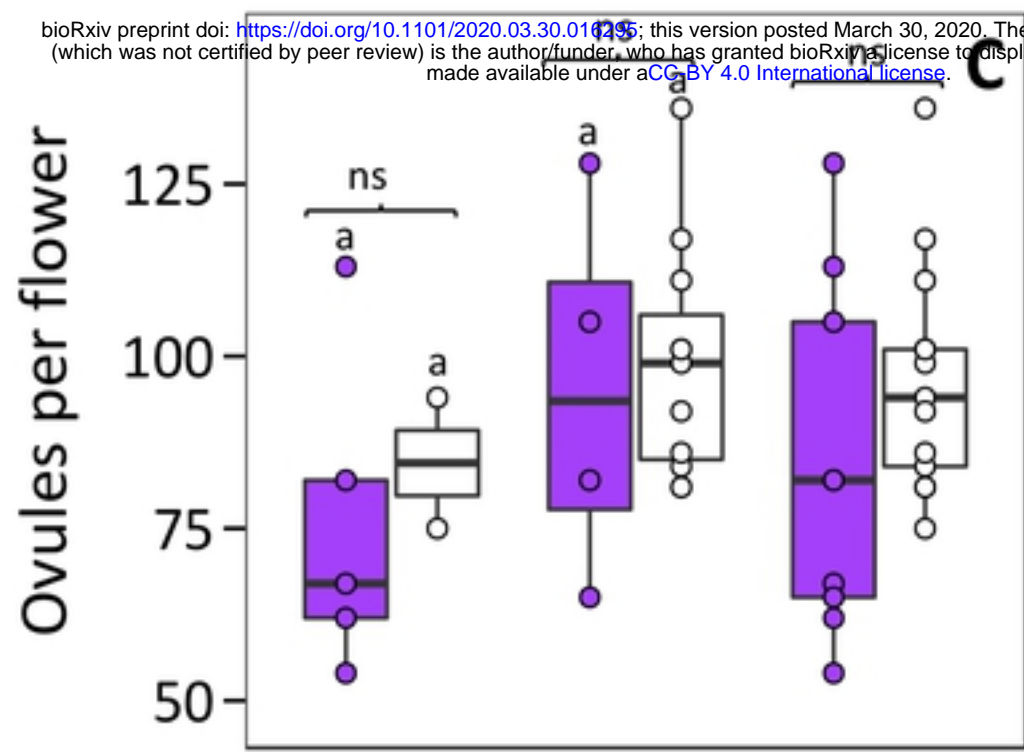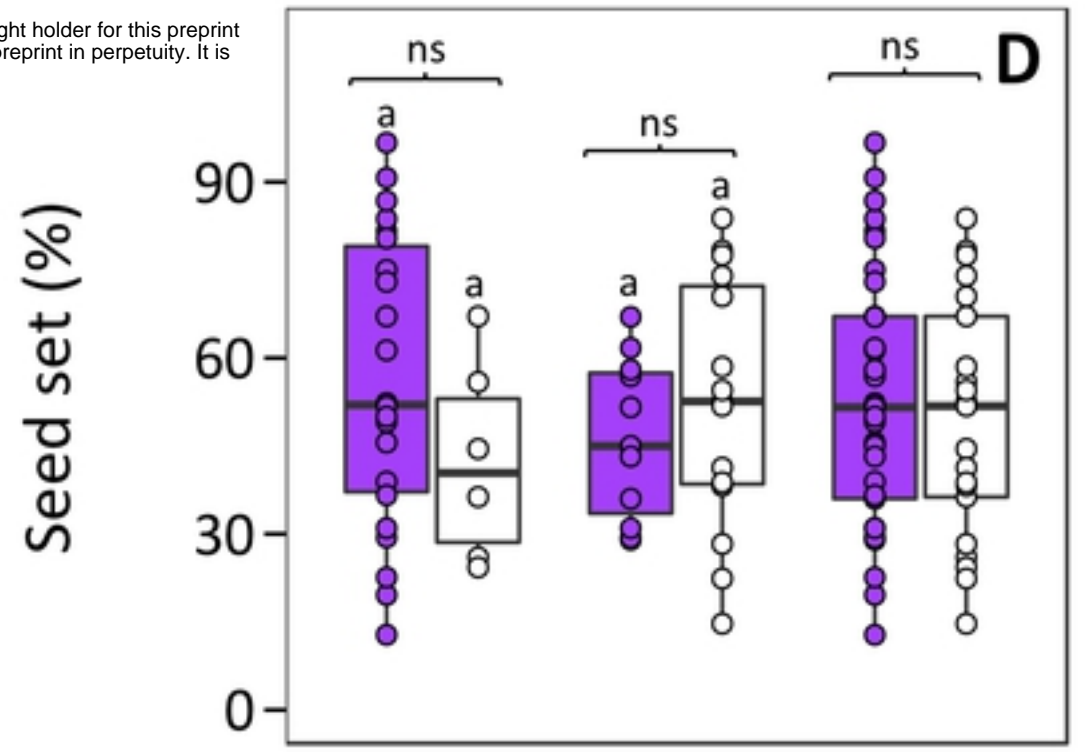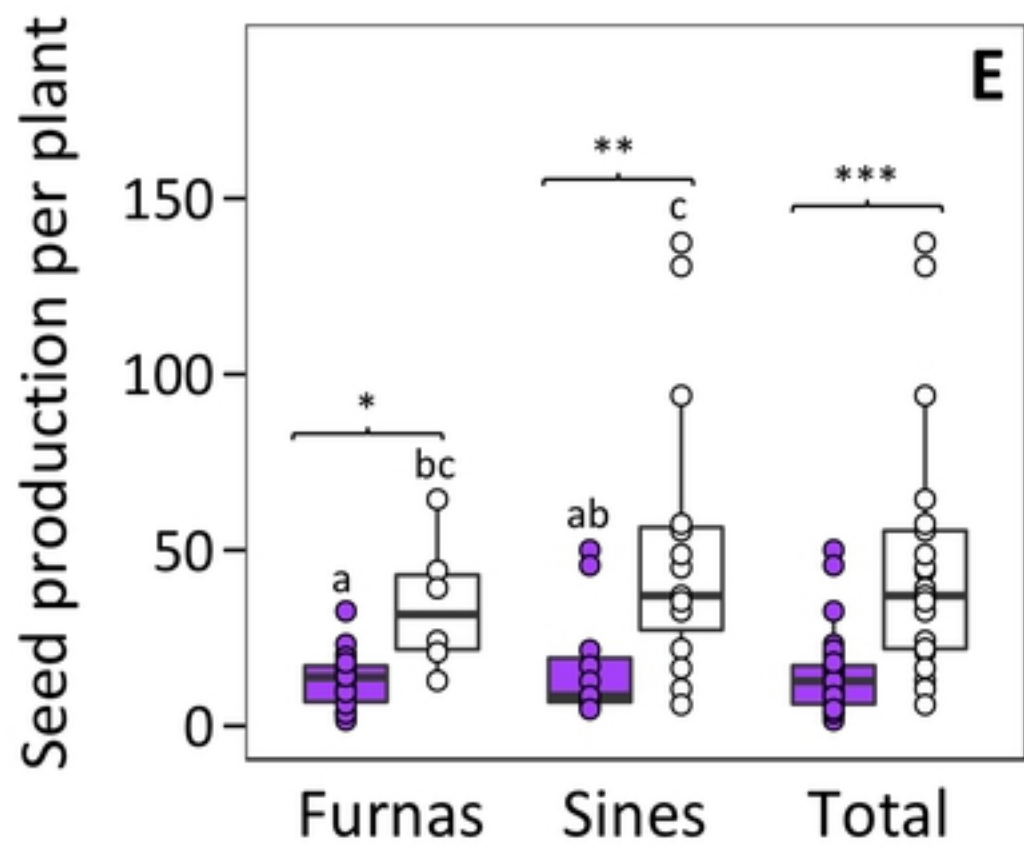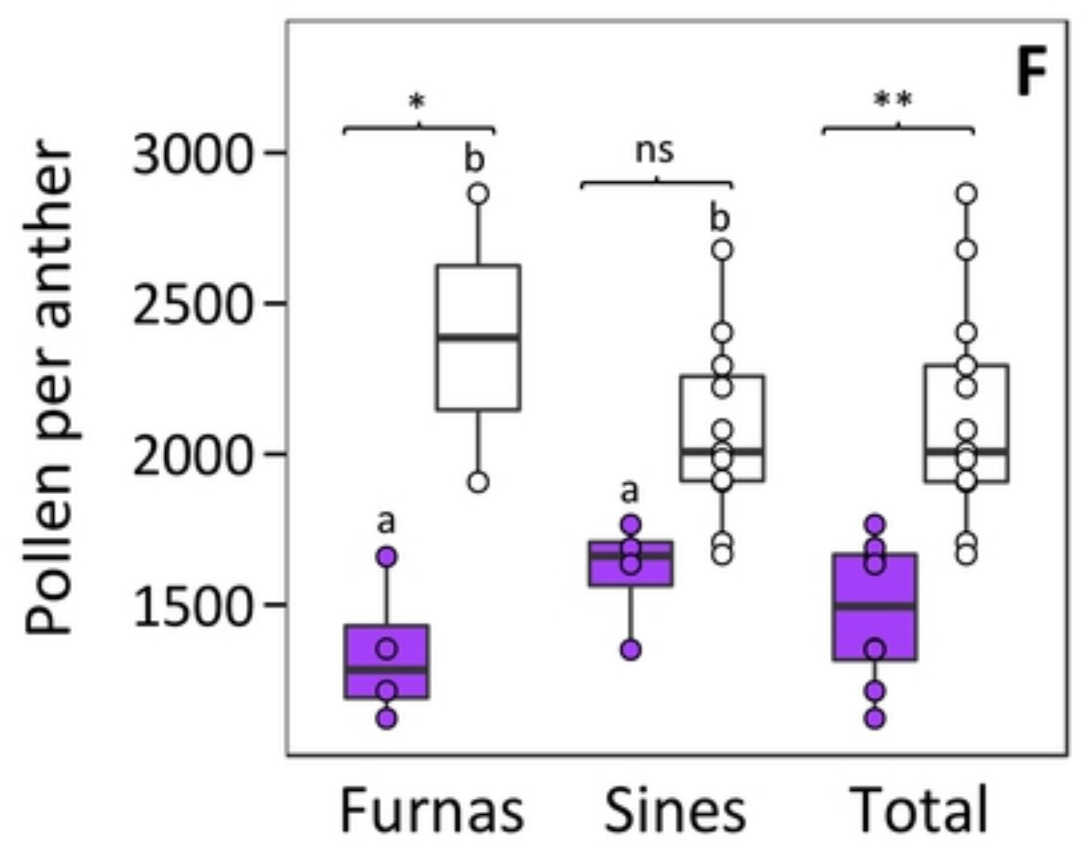

bioRxiv preprint doi: <https://doi.org/10.1101/2020.03.30.016245>; this version posted March 30, 2020. The copyright holder for this preprint (which was not certified by peer review) is the author/funder, who has granted bioRxiv a license to display the preprint in perpetuity. It is made available under aCC-BY 4.0 International license.

Figure4
